# Supplementary material for: Unique-region phosphorylation targets LynA for rapid degradation, tuning its expression and signaling in myeloid cells
Source: eLife journal article supplement (doi:10.7554/elife.46043), 2019-07-08
Supplement: supp [file elife-46043-supp-v1.zip]

Archive with 32 entries (32 files):
- elife_poa_e46043_Figure_7_figure_supplement_1.ai
- elife_poa_e46043_Figure_5_source_data_1.xlsx
- elife_poa_e46043_Figure_6_figure_supplement_1.ai
- elife_poa_e46043_Figure_1_figure_supplement_2_source_data_1.xlsx
- elife_poa_e46043_Figure_4_figure_supplement_5_Source_Data_4.xlsx
- elife_poa_e46043_Figure_4_figure_supplement_3.ai
- elife_poa_e46043_Figure_8_source_data_1.xlsx
- elife_poa_e46043_Figure_1_source_data_1.xlsx
- elife_poa_e46043_Figure_6_source_data_1.xlsx
- elife_poa_e46043_Figure_3_figure_supplement_1.ai
- elife_poa_e46043_Figure_7_figure_supplement_2.ai
- elife_poa_e46043_Figure_9_source_data_1.xlsx
- elife_poa_e46043_Figure_4_figure_supplement_5_Source_Data_3.xlsx
- elife_poa_e46043_Figure_3_source_data_1.xlsx
- elife_poa_e46043_Figure_3_figure_supplement_2_source_data_1.xlsx
- elife_poa_e46043_Figure_1_figure_supplement_1.ai
- elife_poa_e46043_Figure_4_figure_supplement_1_Source_Data_1.xlsx
- elife_poa_e46043_Figure_4_figure_supplement_2.ai
- elife_poa_e46043_Figure_4_figure_supplement_5.ai
- elife_poa_e46043_Figure_3_figure_supplement_2.ai
- elife_poa_e46043_Figure_1_figure_supplement_2.ai
- elife_poa_e46043_Figure_4_figure_supplement_1.ai
- elife_poa_e46043_Figure_4_figure_supplement_4.ai
- elife_poa_e46043_Figure_2_source_data_1.xlsx
- elife_poa_e46043_Figure_4_source_data_1.xlsx
- elife_poa_e46043_Figure_4_figure_supplement_5_source_data_5.xlsx
- elife_poa_e46043_Figure_4_figure_supplement_5_Source_Data_2.xlsx
- elife_poa_e46043_Figure_4_figure_supplement_5_source_data_6.xlsx
- elife_poa_e46043_Figure_4_figure_supplement_5_source_data_1.xlsx
- elife_poa_e46043_Transparent_Reporting_File.pdf
- elife_poa_e46043_Figure_6_figure_supplement_1_source_data_1.xlsx
- elife_poa_e46043_Figure_7_source_data_1.xlsx
