# Supplementary material for: Unique-region phosphorylation targets LynA for rapid degradation, tuning its expression and signaling in myeloid cells
Source: eLife journal article supplement (doi:10.7554/elife.46043), 2019-07-08
Supplement: supp [file elife-46043-supp-v1.zip › elife_poa_e46043_Figure_1_figure_supplement_2_source_data_1.xlsx]

## Sheet: Sheet1
Knockdown Cbl expression
	c-Cbl siRNA			Cbl-b siRNA																																								Within each row, compare columns (simple effects within rows)
	180420	180226	180126	180420	180226	180126
c-Cbl	0.196	0.333333	0.431722	0.581	0.640036	1.05531																																						Number of families	5
Cbl-b	1.15065	0.433558	1.23605	0.537565	0.155956	0.460027																																						Number of comparisons per family	3
																																												Alpha	0.05
LynA protein levels during 3-IB-PP1 treatment (norm to each condition t=0)
	Time (min)	control siRNA			c-Cbl siRNA			Cbl-b siRNA																																				Tukey's multiple comparisons test	Mean Diff.	95.00% CI of diff.	Significant?	Summary	Adjusted P Value
Y1 2018-01-10/0121 LynA_protein (prot each)	0	1	1	1	1	1	1	1	1	1
Y2 0126_total protein (prot each)	1	0.355	0.3017	0.4118	0.693	0.5703	0.8056	0.3407	0.4105	0.417																																		Row 1
Y3 Not primed_02262018_harvest	2	0.225	0.1328	0.269	0.552	0.3959	0.6079	0.196	0.2969	0.2738																																		control siRNA vs. c-Cbl siRNA	0	-0.1714 to 0.1714	No	ns	>0.9999
04202018 harvest	3	0.221	0.142	0.2439	0.441	0.3353	0.4838	0.1882	0.3437	0.3497																																		control siRNA vs. Cbl-b siRNA	0	-0.1714 to 0.1714	No	ns	>0.9999
	5	0.275	0.2176	0.3991	0.433	0.3511	0.6317	0.1557	0.3482	0.4615																																		c-Cbl siRNA vs. Cbl-b siRNA	0	-0.1714 to 0.1714	No	ns	>0.9999
LynA protein levels during 3-IB-PP1 treatment (norm to ctrl t=0)																																												Row 2
Time (min)	Time (min)	control siRNA			c-Cbl siRNA			Cbl-b siRNA																																				control siRNA vs. c-Cbl siRNA	-0.3335	-0.5049 to -0.1621	Yes	***	0.0001
Y1 2018-01-10/0121 LynA_protein (prot each)	0	1	1	1	1.46441	2.05505	1.42889	1.20785	1.02717	0.96236																																		control siRNA vs. Cbl-b siRNA	-0.03323	-0.2046 to 0.1382	No	ns	0.8822
Y2 0126_total protein (prot NC t=-0)	1	0.354667	0.306455	0.411823	1.0155	0.957287	1.1511	0.411473	0.421625	0.40131																																		c-Cbl siRNA vs. Cbl-b siRNA	0.3002	0.1288 to 0.4716	Yes	***	0.0005
Y3 Not primed_02262018_harvest (prot NC t=0)	2	0.224877	0.177415	0.269034	0.808737	0.624341	0.868641	0.236763	0.305009	0.263526
04202018 harvest (prot NC t=0)	3	0.220777	0.145003	0.243942	0.645553	0.506667	0.691337	0.227355	0.353084	0.336545																																		Row 3
	5	0.275003	0.219048	0.399107	0.634057	0.522248	0.902659	0.188102	0.357656	0.444141																																		control siRNA vs. c-Cbl siRNA	-0.3097	-0.4811 to -0.1383	Yes	***	0.0003
																																												control siRNA vs. Cbl-b siRNA	-0.04663	-0.2180 to 0.1248	No	ns	0.7821
																																												c-Cbl siRNA vs. Cbl-b siRNA	0.263	0.09162 to 0.4344	Yes	**	0.0019
																																												04202018 harvest
																																												control siRNA vs. c-Cbl siRNA	-0.2177	-0.3891 to -0.04632	Yes	*	0.0105
																																												control siRNA vs. Cbl-b siRNA	-0.09157	-0.2630 to 0.07985	No	ns	0.3971
																																												c-Cbl siRNA vs. Cbl-b siRNA	0.1262	-0.04525 to 0.2976	No	ns	0.1821
																																												Row 5
																																												control siRNA vs. c-Cbl siRNA	-0.1747	-0.3461 to -0.003284	Yes	*	0.0451
																																												control siRNA vs. Cbl-b siRNA	-0.02457	-0.1960 to 0.1468	No	ns	0.9337
																																												c-Cbl siRNA vs. Cbl-b siRNA	0.1501	-0.02128 to 0.3215	No	ns	0.095
																																												Test details	Mean 1	Mean 2	Mean Diff.	SE of diff.	N1
																																												Row 1
																																												control siRNA vs. c-Cbl siRNA	1	1	0	0.06953	3
																																												control siRNA vs. Cbl-b siRNA	1	1	0	0.06953	3
																																												c-Cbl siRNA vs. Cbl-b siRNA	1	1	0	0.06953	3
																																												Row 2
																																												control siRNA vs. c-Cbl siRNA	0.3562	0.6896	-0.3335	0.06953	3
																																												control siRNA vs. Cbl-b siRNA	0.3562	0.3894	-0.03323	0.06953	3
																																												c-Cbl siRNA vs. Cbl-b siRNA	0.6896	0.3894	0.3002	0.06953	3
																																												Row 3
																																												control siRNA vs. c-Cbl siRNA	0.2089	0.5186	-0.3097	0.06953	3
																																												control siRNA vs. Cbl-b siRNA	0.2089	0.2556	-0.04663	0.06953	3
																																												c-Cbl siRNA vs. Cbl-b siRNA	0.5186	0.2556	0.263	0.06953	3
																																												04202018 harvest
																																												control siRNA vs. c-Cbl siRNA	0.2023	0.42	-0.2177	0.06953	3
																																												control siRNA vs. Cbl-b siRNA	0.2023	0.2939	-0.09157	0.06953	3
																																												c-Cbl siRNA vs. Cbl-b siRNA	0.42	0.2939	0.1262	0.06953	3
																																												Row 5
																																												control siRNA vs. c-Cbl siRNA	0.2972	0.4719	-0.1747	0.06953	3
																																												control siRNA vs. Cbl-b siRNA	0.2972	0.3218	-0.02457	0.06953	3
																																												c-Cbl siRNA vs. Cbl-b siRNA	0.4719	0.3218	0.1501	0.06953	3
																																												Within each row, compare columns (simple effects within rows)
																																												Number of families	5
																																												Number of comparisons per family	3
																																												Alpha	0.05
																																												Tukey's multiple comparisons test	Mean Diff.	95.00% CI of diff.	Significant?	Summary	Adjusted P Value
																																												Row 1
																																												control siRNA vs. c-Cbl siRNA	-0.6495	-0.9106 to -0.3883	Yes	****	<0.0001
																																												control siRNA vs. Cbl-b siRNA	-0.06579	-0.3269 to 0.1953	No	ns	0.8097
																																												c-Cbl siRNA vs. Cbl-b siRNA	0.5837	0.3225 to 0.8448	Yes	****	<0.0001
																																												Row 2
																																												control siRNA vs. c-Cbl siRNA	-0.6836	-0.9448 to -0.4225	Yes	****	<0.0001
																																												control siRNA vs. Cbl-b siRNA	-0.05382	-0.3149 to 0.2073	No	ns	0.868
																																												c-Cbl siRNA vs. Cbl-b siRNA	0.6298	0.3687 to 0.8909	Yes	****	<0.0001
																																												Row 3
																																												control siRNA vs. c-Cbl siRNA	-0.5435	-0.8046 to -0.2823	Yes	****	<0.0001
																																												control siRNA vs. Cbl-b siRNA	-0.04466	-0.3058 to 0.2165	No	ns	0.907
																																												c-Cbl siRNA vs. Cbl-b siRNA	0.4988	0.2377 to 0.7599	Yes	***	0.0002
																																												04202018 harvest (prot NC t=0)
																																												control siRNA vs. c-Cbl siRNA	-0.4113	-0.6724 to -0.1502	Yes	**	0.0015
																																												control siRNA vs. Cbl-b siRNA	-0.1024	-0.3635 to 0.1587	No	ns	0.603
																																												c-Cbl siRNA vs. Cbl-b siRNA	0.3089	0.04774 to 0.5700	Yes	*	0.0177
																																												Row 5
																																												control siRNA vs. c-Cbl siRNA	-0.3886	-0.6497 to -0.1275	Yes	**	0.0026
																																												control siRNA vs. Cbl-b siRNA	-0.03225	-0.2934 to 0.2289	No	ns	0.9503
																																												c-Cbl siRNA vs. Cbl-b siRNA	0.3564	0.09523 to 0.6175	Yes	**	0.0058
																																												Test details	Mean 1	Mean 2	Mean Diff.	SE of diff.	N1
																																												Row 1
																																												control siRNA vs. c-Cbl siRNA	1	1.649	-0.6495	0.1059	3
																																												control siRNA vs. Cbl-b siRNA	1	1.066	-0.06579	0.1059	3
																																												c-Cbl siRNA vs. Cbl-b siRNA	1.649	1.066	0.5837	0.1059	3
																																												Row 2
																																												control siRNA vs. c-Cbl siRNA	0.3576	1.041	-0.6836	0.1059	3
																																												control siRNA vs. Cbl-b siRNA	0.3576	0.4115	-0.05382	0.1059	3
																																												c-Cbl siRNA vs. Cbl-b siRNA	1.041	0.4115	0.6298	0.1059	3
																																												Row 3
																																												control siRNA vs. c-Cbl siRNA	0.2238	0.7672	-0.5435	0.1059	3
																																												control siRNA vs. Cbl-b siRNA	0.2238	0.2684	-0.04466	0.1059	3
																																												c-Cbl siRNA vs. Cbl-b siRNA	0.7672	0.2684	0.4988	0.1059	3
																																												04202018 harvest (prot NC t=0)
																																												control siRNA vs. c-Cbl siRNA	0.2032	0.6145	-0.4113	0.1059	3
																																												control siRNA vs. Cbl-b siRNA	0.2032	0.3057	-0.1024	0.1059	3
																																												c-Cbl siRNA vs. Cbl-b siRNA	0.6145	0.3057	0.3089	0.1059	3
																																												Row 5
																																												control siRNA vs. c-Cbl siRNA	0.2977	0.6863	-0.3886	0.1059	3
																																												control siRNA vs. Cbl-b siRNA	0.2977	0.33	-0.03225	0.1059	3
																																												c-Cbl siRNA vs. Cbl-b siRNA	0.6863	0.33	0.3564	0.1059	3
[truncated: 3 more columns]
