# Supplementary material for: Unique-region phosphorylation targets LynA for rapid degradation, tuning its expression and signaling in myeloid cells
Source: eLife journal article supplement (doi:10.7554/elife.46043), 2019-07-08
Supplement: supp [file elife-46043-supp-v1.zip › elife_poa_e46043_Figure_1_source_data_1.xlsx]

## Sheet: Sheet1
Knockout Cbl expression																																												Within each row, compare columns (simple effects within rows)
	CskASCbl-/-				CskASCblb-/-
c-Cbl	0.0279959	0.0163694	0.037	0.1515	1.89553	0.435722	2.27879																																					Number of families	1
Cbl-b	0.826	0.698	1.1	0.969	0.018801	0.020837	0.009804																																					Number of comparisons per family	15
																																												Alpha	0.05
LynA protein levels during 3-IB-PP1 treatment (norm to each condition t=0)																																												Sidak's multiple comparisons test	Predicted (LS) mean diff.	95.00% CI of diff.	Significant?	Summary	Adjusted P Value
time (min)	CskAS								CskAS cbl-/-								CskAS cblb-/-
0	1	1	1	1	1	1	1	1	1.12	4.199	1.911	3.768	3.126									1	1	1																				Row 1
1	0.428	0.846	0.709	0.358	0.345	0.201418	0.166308	0.331576	1.476	4.52	1.457	3.001	3.235									0.187273	0.16628	0.21697																				CskAS vs. CskAS cbl-/-	0	-0.2585 to 0.2585	No	ns	>0.9999
2	0.274	0.584	0.537	0.253	0.329	0.190998	0.063503	0.288456	1.127	4.024	1.642	2.609	2.519									0.182124	0.184994	0.204135																				CskAS vs. CskAS Cblb/-	0	-0.3046 to 0.3046	No	ns	>0.9999
3	0.311	0.583	0.574	0.268	0.341	0.164144	0.034726	0.245075	0.922	3.65	1.354	2.715	2.334									0.175721	0.209611	0.212621																				CskAS cbl-/- vs. CskAS Cblb/-	0	-0.3224 to 0.3224	No	ns	>0.9999
5	0.391	0.785	0.649	0.324	0.444	0.204215	0.040366	0.209413	0.858	2.484	1.388	1.834	1.499									0.276458	0.280916	0.245024
									2.8248		0.996196																																	Row 2
LynA protein levels during 3-IB-PP1 treatment (norm to CskAS t=0)																																												CskAS vs. CskAS cbl-/-	-0.5379	-0.7964 to -0.2795	Yes	****	<0.0001
time (min)	CskAS								CskAS cbl-/-								CskAS cblb-/-																											CskAS vs. CskAS Cblb/-	0.2697	-0.03495 to 0.5743	No	ns	0.127
0	1	1	1	1	1	1	1	1	1.12	4.199	1.911	3.768	3.126									1.09246	0.1789	0.877441																				CskAS cbl-/- vs. CskAS Cblb/-	0.8076	0.4852 to 1.130	Yes	****	<0.0001
1	0.428	0.846	0.709	0.358	0.345	0.201418	0.166308	0.331576	1.476	4.52	1.457	3.001	3.235									0.204588	0.029748	0.190379
2	0.274	0.584	0.537	0.253	0.329	0.190998	0.063503	0.288456	1.127	4.024	1.642	2.609	2.519									0.198962	0.033096	0.179117																				Row 3
3	0.311	0.583	0.574	0.268	0.341	0.164144	0.034726	0.245075	0.922	3.65	1.354	2.715	2.334									0.191968	0.0375	0.186563																				CskAS vs. CskAS cbl-/-	-0.5133	-0.7718 to -0.2548	Yes	****	<0.0001
5	0.391	0.785	0.649	0.324	0.444	0.204215	0.040366	0.209413	0.858	2.484	1.388	1.834	1.499									0.302018	0.050256	0.214994																				CskAS vs. CskAS Cblb/-	0.1605	-0.1441 to 0.4651	No	ns	0.8357
																																												CskAS cbl-/- vs. CskAS Cblb/-	0.6738	0.3514 to 0.9962	Yes	****	<0.0001
																																												Row 4
																																												CskAS vs. CskAS cbl-/-	-0.4182	-0.6767 to -0.1597	Yes	***	0.0001
																																												CskAS vs. CskAS Cblb/-	0.1559	-0.1488 to 0.4605	No	ns	0.8628
																																												CskAS cbl-/- vs. CskAS Cblb/-	0.5741	0.2517 to 0.8965	Yes	****	<0.0001
																																												Row 5
																																												CskAS vs. CskAS cbl-/-	-0.1807	-0.4392 to 0.07781	No	ns	0.4335
																																												CskAS vs. CskAS Cblb/-	0.1621	-0.1426 to 0.4667	No	ns	0.8261
																																												CskAS cbl-/- vs. CskAS Cblb/-	0.3427	0.02034 to 0.6651	Yes	*	0.0288
																																												Test details	Predicted (LS) mean 1	Predicted (LS) mean 2	Predicted (LS) mean diff.	SE of diff.	N1
																																												Row 1
																																												CskAS vs. CskAS cbl-/-	1	1	0	0.08478	7
																																												CskAS vs. CskAS Cblb/-	1	1	0	0.09991	7
																																												CskAS cbl-/- vs. CskAS Cblb/-	1	1	0	0.1057	5
																																												Row 2
																																												CskAS vs. CskAS cbl-/-	0.4599	0.9978	-0.5379	0.08478	7
																																												CskAS vs. CskAS Cblb/-	0.4599	0.1902	0.2697	0.09991	7
																																												CskAS cbl-/- vs. CskAS Cblb/-	0.9978	0.1902	0.8076	0.1057	5
																																												Row 3
																																												CskAS vs. CskAS cbl-/-	0.3509	0.8642	-0.5133	0.08478	7
																																												CskAS vs. CskAS Cblb/-	0.3509	0.1904	0.1605	0.09991	7
																																												CskAS cbl-/- vs. CskAS Cblb/-	0.8642	0.1904	0.6738	0.1057	5
																																												Row 4
																																												CskAS vs. CskAS cbl-/-	0.3552	0.7734	-0.4182	0.08478	7
																																												CskAS vs. CskAS Cblb/-	0.3552	0.1993	0.1559	0.09991	7
																																												CskAS cbl-/- vs. CskAS Cblb/-	0.7734	0.1993	0.5741	0.1057	5
																																												Row 5
																																												CskAS vs. CskAS cbl-/-	0.4295	0.6102	-0.1807	0.08478	7
																																												CskAS vs. CskAS Cblb/-	0.4295	0.2675	0.1621	0.09991	7
																																												CskAS cbl-/- vs. CskAS Cblb/-	0.6102	0.2675	0.3427	0.1057	5
																																												Within each row, compare columns (simple effects within rows)
																																												Number of families	1
																																												Number of comparisons per family	15
																																												Alpha	0.05
																																												Sidak's multiple comparisons test	Predicted (LS) mean diff.	95.00% CI of diff.	Significant?	Summary	Adjusted P Value
																																												Row 1
																																												CskAS vs. CskAS cbl-/-	-1.825	-2.925 to -0.7246	Yes	****	<0.0001
																																												CskAS vs. CskAS cblb-/-	0.2837	-1.023 to 1.590	No	ns	>0.9999
																																												CskAS cbl-/- vs. CskAS cblb-/-	2.109	0.6991 to 3.518	Yes	***	0.0004
																																												Row 2
																																												CskAS vs. CskAS cbl-/-	-2.315	-3.415 to -1.214	Yes	****	<0.0001
																																												CskAS vs. CskAS cblb-/-	0.2816	-1.025 to 1.588	No	ns	>0.9999
																																												CskAS cbl-/- vs. CskAS cblb-/-	2.596	1.187 to 4.006	Yes	****	<0.0001
																																												Row 3
																																												CskAS vs. CskAS cbl-/-	-2.069	-3.169 to -0.9690	Yes	****	<0.0001
																																												CskAS vs. CskAS cblb-/-	0.1779	-1.129 to 1.485	No	ns	>0.9999
																																												CskAS cbl-/- vs. CskAS cblb-/-	2.247	0.8377 to 3.657	Yes	***	0.0001
																																												Row 4
																																												CskAS vs. CskAS cbl-/-	-1.88	-2.980 to -0.7797	Yes	****	<0.0001
																																												CskAS vs. CskAS cblb-/-	0.1764	-1.130 to 1.483	No	ns	>0.9999
																																												CskAS cbl-/- vs. CskAS cblb-/-	2.056	0.6469 to 3.466	Yes	***	0.0005
																																												Row 5
																																												CskAS vs. CskAS cbl-/-	-1.232	-2.332 to -0.1315	Yes	*	0.0171
																																												CskAS vs. CskAS cblb-/-	0.1918	-1.115 to 1.498	No	ns	>0.9999
																																												CskAS cbl-/- vs. CskAS cblb-/-	1.424	0.01409 to 2.833	Yes	*	0.0459
																																												Test details	Predicted (LS) mean 1	Predicted (LS) mean 2	Predicted (LS) mean diff.	SE of diff.	N1
																																												Row 1
																																												CskAS vs. CskAS cbl-/-	1	2.825	-1.825	0.362	8
																																												CskAS vs. CskAS cblb-/-	1	0.7163	0.2837	0.4299	8
																																												CskAS cbl-/- vs. CskAS cblb-/-	2.825	0.7163	2.109	0.4637	5
																																												Row 2
																																												CskAS vs. CskAS cbl-/-	0.4232	2.738	-2.315	0.362	8
																																												CskAS vs. CskAS cblb-/-	0.4232	0.1416	0.2816	0.4299	8
																																												CskAS cbl-/- vs. CskAS cblb-/-	2.738	0.1416	2.596	0.4637	5
																																												Row 3
																																												CskAS vs. CskAS cbl-/-	0.315	2.384	-2.069	0.362	8
																																												CskAS vs. CskAS cblb-/-	0.315	0.1371	0.1779	0.4299	8
																																												CskAS cbl-/- vs. CskAS cblb-/-	2.384	0.1371	2.247	0.4637	5
																																												Row 4
																																												CskAS vs. CskAS cbl-/-	0.3151	2.195	-1.88	0.362	8
																																												CskAS vs. CskAS cblb-/-	0.3151	0.1387	0.1764	0.4299	8
																																												CskAS cbl-/- vs. CskAS cblb-/-	2.195	0.1387	2.056	0.4637	5
																																												Row 5
																																												CskAS vs. CskAS cbl-/-	0.3809	1.613	-1.232	0.362	8
																																												CskAS vs. CskAS cblb-/-	0.3809	0.1891	0.1918	0.4299	8
																																												CskAS cbl-/- vs. CskAS cblb-/-	1.613	0.1891	1.424	0.4637	5
[truncated: 3 more columns]
