# Supplementary material for: Unique-region phosphorylation targets LynA for rapid degradation, tuning its expression and signaling in myeloid cells
Source: eLife journal article supplement (doi:10.7554/elife.46043), 2019-07-08
Supplement: supp [file elife-46043-supp-v1.zip › elife_poa_e46043_Figure_2_source_data_1.xlsx]

## Sheet: Sheet1
SFK protein levels during 3-IB-PP1 treatment in CskAS BMDMs (norm to t=0)
Time (min)	LynA			LynB			Fyn			Hck							Within each row, compare columns (simple effects within rows)
0	1	1	1	1	1	1	1	1	1	1	1	1
3	0.315635	0.3797	0.351706	0.940879	0.804946	0.828013	1.68118	1.07312	1.11096	1.03002	0.873494	1.07678					Number of families	3
5	0.311391	0.512065	0.468385	0.963622	0.837132	0.960473	1.55809	1.18384	1.13205	0.956785	0.78986	1.01241					Number of comparisons per family	6
																	Alpha	0.05
SFK protein levels during 3-IB-PP1 treatment in Jurkat cells transfected with memCskAS, LynA, and c-Cbl (norm to t=0)
Time (min)	LynA				Fyn				Lck								Tukey's multiple comparisons test	Mean Diff.	95.00% CI of diff.	Significant?	Summary	Adjusted P Value
0	1	1	1	1	1	1	1	1	1	1	1	1
5	0.667288	0.534038	0.856147	0.512092	0.997438	1.04995	1.14157	1.12741	1.01663	1.01604	1.04851	1.37488					Row 1
20	0.842388	0.62543	0.781686	0.2854	0.954901	0.994217	1.14216	1.30605	0.842463	1.00724	1.10639	1.48798					LynA vs. LynB	0	-0.3032 to 0.3032	No	ns	>0.9999
																	LynA vs. Fyn	0	-0.3032 to 0.3032	No	ns	>0.9999
																	LynA vs. Hck	0	-0.3032 to 0.3032	No	ns	>0.9999
																	LynB vs. Fyn	0	-0.3032 to 0.3032	No	ns	>0.9999
																	LynB vs. Hck	0	-0.3032 to 0.3032	No	ns	>0.9999
																	Fyn vs. Hck	0	-0.3032 to 0.3032	No	ns	>0.9999
																	Row 2
																	LynA vs. LynB	-0.5089	-0.8122 to -0.2057	Yes	***	0.0006
																	LynA vs. Fyn	-0.9394	-1.243 to -0.6362	Yes	****	<0.0001
																	LynA vs. Hck	-0.6444	-0.9477 to -0.3412	Yes	****	<0.0001
																	LynB vs. Fyn	-0.4305	-0.7337 to -0.1272	Yes	**	0.0034
																	LynB vs. Hck	-0.1355	-0.4387 to 0.1678	No	ns	0.613
																	Fyn vs. Hck	0.295	-0.008257 to 0.5982	No	ns	0.0586
																	Row 3
																	LynA vs. LynB	-0.4898	-0.7930 to -0.1865	Yes	***	0.0009
																	LynA vs. Fyn	-0.8607	-1.164 to -0.5575	Yes	****	<0.0001
																	LynA vs. Hck	-0.4891	-0.7923 to -0.1858	Yes	***	0.0009
																	LynB vs. Fyn	-0.3709	-0.6742 to -0.06767	Yes	*	0.0125
																	LynB vs. Hck	0.0007223	-0.3025 to 0.3040	No	ns	>0.9999
																	Fyn vs. Hck	0.3716	0.06839 to 0.6749	Yes	*	0.0123
																	Test details	Mean 1	Mean 2	Mean Diff.	SE of diff.	N1	N2	q	DF
																	Row 1
																	LynA vs. LynB	1	1	0	0.1099	3	3	0	24
																	LynA vs. Fyn	1	1	0	0.1099	3	3	0	24
																	LynA vs. Hck	1	1	0	0.1099	3	3	0	24
																	LynB vs. Fyn	1	1	0	0.1099	3	3	0	24
																	LynB vs. Hck	1	1	0	0.1099	3	3	0	24
																	Fyn vs. Hck	1	1	0	0.1099	3	3	0	24
																	Row 2
																	LynA vs. LynB	0.349	0.8579	-0.5089	0.1099	3	3	6.547	24
																	LynA vs. Fyn	0.349	1.288	-0.9394	0.1099	3	3	12.09	24
																	LynA vs. Hck	0.349	0.9934	-0.6444	0.1099	3	3	8.29	24
																	LynB vs. Fyn	0.8579	1.288	-0.4305	0.1099	3	3	5.538	24
																	LynB vs. Hck	0.8579	0.9934	-0.1355	0.1099	3	3	1.743	24
																	Fyn vs. Hck	1.288	0.9934	0.295	0.1099	3	3	3.795	24
																	Row 3
																	LynA vs. LynB	0.4306	0.9204	-0.4898	0.1099	3	3	6.301	24
																	LynA vs. Fyn	0.4306	1.291	-0.8607	0.1099	3	3	11.07	24
																	LynA vs. Hck	0.4306	0.9197	-0.4891	0.1099	3	3	6.292	24
																	LynB vs. Fyn	0.9204	1.291	-0.3709	0.1099	3	3	4.772	24
																	LynB vs. Hck	0.9204	0.9197	0.0007223	0.1099	3	3	0.009293	24
																	Fyn vs. Hck	1.291	0.9197	0.3716	0.1099	3	3	4.781	24
																	Within each row, compare columns (simple effects within rows)
																	Number of families	1
																	Number of comparisons per family	9
																	Alpha	0.05
																	Sidak's multiple comparisons test	Mean Diff.	95.00% CI of diff.	Significant?	Summary	Adjusted P Value
																	Row 1
																	LynA vs. Fyn	0	-0.3343 to 0.3343	No	ns	>0.9999
																	LynA vs. Lck	0	-0.3343 to 0.3343	No	ns	>0.9999
																	Fyn vs. Lck	0	-0.3343 to 0.3343	No	ns	>0.9999
																	Row 2
																	LynA vs. Fyn	-0.4367	-0.7710 to -0.1024	Yes	**	0.0048
																	LynA vs. Lck	-0.4716	-0.8059 to -0.1373	Yes	**	0.0021
																	Fyn vs. Lck	-0.03492	-0.3692 to 0.2994	No	ns	>0.9999
																	Row 3
																	LynA vs. Fyn	-0.4656	-0.7999 to -0.1313	Yes	**	0.0024
																	LynA vs. Lck	-0.4773	-0.8116 to -0.1430	Yes	**	0.0018
																	Fyn vs. Lck	-0.01168	-0.3460 to 0.3226	No	ns	>0.9999
																	Test details	Mean 1	Mean 2	Mean Diff.	SE of diff.	N1	N2	t	DF
																	Row 1
																	LynA vs. Fyn	1	1	0	0.1113	4	4	0	27
																	LynA vs. Lck	1	1	0	0.1113	4	4	0	27
																	Fyn vs. Lck	1	1	0	0.1113	4	4	0	27
																	Row 2
																	LynA vs. Fyn	0.6424	1.079	-0.4367	0.1113	4	4	3.925	27
																	LynA vs. Lck	0.6424	1.114	-0.4716	0.1113	4	4	4.239	27
																	Fyn vs. Lck	1.079	1.114	-0.03492	0.1113	4	4	0.3139	27
																	Row 3
																	LynA vs. Fyn	0.6337	1.099	-0.4656	0.1113	4	4	4.185	27
																	LynA vs. Lck	0.6337	1.111	-0.4773	0.1113	4	4	4.29	27
																	Fyn vs. Lck	1.099	1.111	-0.01168	0.1113	4	4	0.105	27
