# Supplementary material for: Unique-region phosphorylation targets LynA for rapid degradation, tuning its expression and signaling in myeloid cells
Source: eLife journal article supplement (doi:10.7554/elife.46043), 2019-07-08
Supplement: supp [file elife-46043-supp-v1.zip › elife_poa_e46043_Figure_3_figure_supplement_2_source_data_1.xlsx]

## Sheet: Sheet1
LynA protein levels during 3-IB-PP1 treatment, mutation analysis (norm to wt t=0)
Time (min)	LynA							LynA Y32A							LynB							LynA K40R							T27A							Y32F
	20180313 Y1	20180313 Y2	20180313 Y3	20180313 Y4	042818	20180819	20180820	20180313 Y1	20180313 Y2	20180313 Y3	20180313 Y4	042818	20180819	20180820	20180313 Y1	20180313 Y2	20180313 Y3	20180313 Y4	042818	20180819	20180820	20180313 Y1	20180313 Y2	20180313 Y3	20180313 Y4	042818	20180819	20180820	20180313 Y1	20180313 Y2	20180313 Y3	20180313 Y4	042818	20180819	20180820	20180313 Y1	20180313 Y2	20180313 Y3	20180313 Y4	042818	20180819	20180820
0	1	1	1	1	1	1	1	3.57	2.11	2.83	1.62				2.6	2.5	2.37	0.53				1.52	1.2	0.64									0.382327	1.49	1.26					0.759086	1.35	1.47
5	0.82	0.53	0.66	0.57	0.56219	0.56	0.68	3.8	1.67	2.73	1.34				2.9	1.84	1.99	0.48				1.08	0.57	0.45									0.250286	0.77	0.62					0.72861	1.33	1.21
20	0.65	0.57	0.6	0.5	0.399495	0.47	0.56	3.51	1.98	2.24	1.28				2.57	1.79	1.92	0.46				0.67	0.51	0.41									0.123028	0.58	0.49					0.555048	0.99	1.09
Within each row, compare columns (simple effects within rows)											Within each row, compare columns (simple effects within rows)
Number of families	3										Number of families	3
Number of comparisons per family	15										Number of comparisons per family	15
Alpha	0.05										Alpha	0.05
Tukey's multiple comparisons test	Predicted (LS) mean diff.	95.00% CI of diff.	Significant?	Summary	Adjusted P Value						Tukey's multiple comparisons test	Predicted (LS) mean diff.	95.00% CI of diff.	Significant?	Summary	Adjusted P Value
Row 1											Row 1
LynA vs. LynA Y32A	0	-0.1581 to 0.1581	No	ns	>0.9999						LynA vs. LynA Y32A	-1.533	-2.634 to -0.4309	Yes	**	0.0018
LynA vs. LynB	0	-0.1581 to 0.1581	No	ns	>0.9999						LynA vs. LynB	-1	-2.102 to 0.1016	No	ns	0.0957
LynA vs. LynA K40R	0	-0.1741 to 0.1741	No	ns	>0.9999						LynA vs. LynA K40R	-0.12	-1.333 to 1.093	No	ns	0.9997
LynA vs. T27A	0	-0.1741 to 0.1741	No	ns	>0.9999						LynA vs. T27A	-0.04411	-1.257 to 1.169	No	ns	>0.9999
LynA vs. Y32F	0	-0.1741 to 0.1741	No	ns	>0.9999						LynA vs. Y32F	-0.193	-1.406 to 1.020	No	ns	0.997
LynA Y32A vs. LynB	0	-0.1784 to 0.1784	No	ns	>0.9999						LynA Y32A vs. LynB	0.5325	-0.7102 to 1.775	No	ns	0.8019
LynA Y32A vs. LynA K40R	0	-0.1927 to 0.1927	No	ns	>0.9999						LynA Y32A vs. LynA K40R	1.413	0.07019 to 2.755	Yes	*	0.0337
LynA Y32A vs. T27A	0	-0.1927 to 0.1927	No	ns	>0.9999						LynA Y32A vs. T27A	1.488	0.1461 to 2.831	Yes	*	0.0216
LynA Y32A vs. Y32F	0	-0.1927 to 0.1927	No	ns	>0.9999						LynA Y32A vs. Y32F	1.339	-0.002843 to 2.682	No	ns	0.0508
LynB vs. LynA K40R	0	-0.1927 to 0.1927	No	ns	>0.9999						LynB vs. LynA K40R	0.88	-0.4623 to 2.222	No	ns	0.3916
LynB vs. T27A	0	-0.1927 to 0.1927	No	ns	>0.9999						LynB vs. T27A	0.9559	-0.3864 to 2.298	No	ns	0.3008
LynB vs. Y32F	0	-0.1927 to 0.1927	No	ns	>0.9999						LynB vs. Y32F	0.807	-0.5353 to 2.149	No	ns	0.4893
LynA K40R vs. T27A	0	-0.2060 to 0.2060	No	ns	>0.9999						LynA K40R vs. T27A	0.07589	-1.359 to 1.511	No	ns	>0.9999
LynA K40R vs. Y32F	0	-0.2060 to 0.2060	No	ns	>0.9999						LynA K40R vs. Y32F	-0.07303	-1.508 to 1.362	No	ns	>0.9999
T27A vs. Y32F	0	-0.2060 to 0.2060	No	ns	>0.9999						T27A vs. Y32F	-0.1489	-1.584 to 1.286	No	ns	0.9996
Row 2											Row 2
LynA vs. LynA Y32A	-0.2877	-0.4458 to -0.1296	Yes	****	<0.0001						LynA vs. LynA Y32A	-1.759	-2.861 to -0.6574	Yes	***	0.0002
LynA vs. LynB	-0.2727	-0.4308 to -0.1146	Yes	****	<0.0001						LynA vs. LynB	-1.176	-2.278 to -0.07490	Yes	*	0.0298
LynA vs. LynA K40R	0.001646	-0.1724 to 0.1757	No	ns	>0.9999						LynA vs. LynA K40R	-0.07397	-1.287 to 1.139	No	ns	>0.9999
LynA vs. T27A	0.07377	-0.1003 to 0.2479	No	ns	0.8092						LynA vs. T27A	0.07927	-1.134 to 1.292	No	ns	>0.9999
LynA vs. Y32F	-0.293	-0.4671 to -0.1189	Yes	****	<0.0001						LynA vs. Y32F	-0.4635	-1.676 to 0.7493	No	ns	0.8671
LynA Y32A vs. LynB	0.015	-0.1634 to 0.1934	No	ns	0.9999						LynA Y32A vs. LynB	0.5825	-0.6602 to 1.825	No	ns	0.7358
LynA Y32A vs. LynA K40R	0.2893	0.09665 to 0.4820	Yes	***	0.0006						LynA Y32A vs. LynA K40R	1.685	0.3427 to 3.027	Yes	**	0.0062
LynA Y32A vs. T27A	0.3615	0.1688 to 0.5541	Yes	****	<0.0001						LynA Y32A vs. T27A	1.838	0.4959 to 3.181	Yes	**	0.0022
LynA Y32A vs. Y32F	-0.005283	-0.1980 to 0.1874	No	ns	>0.9999						LynA Y32A vs. Y32F	1.295	-0.04685 to 2.638	No	ns	0.0644
LynB vs. LynA K40R	0.2743	0.08165 to 0.4670	Yes	**	0.0013						LynB vs. LynA K40R	1.103	-0.2398 to 2.445	No	ns	0.1655
LynB vs. T27A	0.3465	0.1538 to 0.5391	Yes	****	<0.0001						LynB vs. T27A	1.256	-0.08658 to 2.598	No	ns	0.0792
LynB vs. Y32F	-0.02028	-0.2130 to 0.1724	No	ns	0.9996						LynB vs. Y32F	0.713	-0.6294 to 2.055	No	ns	0.6218
LynA K40R vs. T27A	0.07212	-0.1339 to 0.2781	No	ns	0.9042						LynA K40R vs. T27A	0.1532	-1.282 to 1.588	No	ns	0.9996
LynA K40R vs. Y32F	-0.2946	-0.5006 to -0.08863	Yes	**	0.0012						LynA K40R vs. Y32F	-0.3895	-1.825 to 1.045	No	ns	0.9659
T27A vs. Y32F	-0.3667	-0.5727 to -0.1607	Yes	****	<0.0001						T27A vs. Y32F	-0.5428	-1.978 to 0.8922	No	ns	0.872
Row 3											Row 3
LynA vs. LynA Y32A	-0.3404	-0.4986 to -0.1823	Yes	****	<0.0001						LynA vs. LynA Y32A	-1.717	-2.818 to -0.6153	Yes	***	0.0004
LynA vs. LynB	-0.3107	-0.4688 to -0.1526	Yes	****	<0.0001						LynA vs. LynB	-1.149	-2.251 to -0.04779	Yes	*	0.0361
LynA vs. LynA K40R	0.03774	-0.1364 to 0.2118	No	ns	0.9874						LynA vs. LynA K40R	0.005642	-1.207 to 1.218	No	ns	>0.9999
LynA vs. T27A	0.1695	-0.004618 to 0.3436	No	ns	0.0606						LynA vs. T27A	0.138	-1.075 to 1.351	No	ns	0.9994
LynA vs. Y32F	-0.1987	-0.3728 to -0.02457	Yes	*	0.0166						LynA vs. Y32F	-0.3427	-1.555 to 0.8701	No	ns	0.9596
LynA Y32A vs. LynB	0.02975	-0.1486 to 0.2081	No	ns	0.9962						LynA Y32A vs. LynB	0.5675	-0.6752 to 1.810	No	ns	0.7564
LynA Y32A vs. LynA K40R	0.3782	0.1855 to 0.5709	Yes	****	<0.0001						LynA Y32A vs. LynA K40R	1.723	0.3802 to 3.065	Yes	**	0.0049
LynA Y32A vs. T27A	0.5099	0.3172 to 0.7026	Yes	****	<0.0001						LynA Y32A vs. T27A	1.855	0.5125 to 3.197	Yes	**	0.002
LynA Y32A vs. Y32F	0.1418	-0.05092 to 0.3344	No	ns	0.2669						LynA Y32A vs. Y32F	1.374	0.03184 to 2.716	Yes	*	0.0419
LynB vs. LynA K40R	0.3484	0.1557 to 0.5411	Yes	****	<0.0001						LynB vs. LynA K40R	1.155	-0.1873 to 2.497	No	ns	0.1301
LynB vs. T27A	0.4802	0.2875 to 0.6728	Yes	****	<0.0001						LynB vs. T27A	1.287	-0.05499 to 2.630	No	ns	0.0672
LynB vs. Y32F	0.112	-0.08067 to 0.3047	No	ns	0.5266						LynB vs. Y32F	0.8067	-0.5357 to 2.149	No	ns	0.4898
LynA K40R vs. T27A	0.1317	-0.07425 to 0.3377	No	ns	0.4196						LynA K40R vs. T27A	0.1323	-1.303 to 1.567	No	ns	0.9998
LynA K40R vs. Y32F	-0.2364	-0.4424 to -0.03041	Yes	*	0.0157						LynA K40R vs. Y32F	-0.3483	-1.783 to 1.087	No	ns	0.979
T27A vs. Y32F	-0.3681	-0.5741 to -0.1622	Yes	****	<0.0001						T27A vs. Y32F	-0.4807	-1.916 to 0.9543	No	ns	0.9193
Test details	Predicted (LS) mean 1	Predicted (LS) mean 2	Predicted (LS) mean diff.	SE of diff.	N1	N2	q	DF			Test details	Predicted (LS) mean 1	Predicted (LS) mean 2	Predicted (LS) mean diff.	SE of diff.	N1	N2	q	DF
Row 1											Row 1
LynA vs. LynA Y32A	1	1	0	0.05352	7	4	0	54			LynA vs. LynA Y32A	1	2.533	-1.533	0.3728	7	4	5.813	54
LynA vs. LynB	1	1	0	0.05352	7	4	0	54			LynA vs. LynB	1	2	-1	0.3728	7	4	3.793	54
LynA vs. LynA K40R	1	1	0	0.05892	7	3	0	54			LynA vs. LynA K40R	1	1.12	-0.12	0.4105	7	3	0.4134	54
LynA vs. T27A	1	1	0	0.05892	7	3	0	54			LynA vs. T27A	1	1.044	-0.04411	0.4105	7	3	0.152	54
LynA vs. Y32F	1	1	0	0.05892	7	3	0	54			LynA vs. Y32F	1	1.193	-0.193	0.4105	7	3	0.665	54
LynA Y32A vs. LynB	1	1	0	0.06038	4	4	0	54			LynA Y32A vs. LynB	2.533	2	0.5325	0.4206	4	4	1.79	54
LynA Y32A vs. LynA K40R	1	1	0	0.06522	4	3	0	54			LynA Y32A vs. LynA K40R	2.533	1.12	1.413	0.4543	4	3	4.397	54
LynA Y32A vs. T27A	1	1	0	0.06522	4	3	0	54			LynA Y32A vs. T27A	2.533	1.044	1.488	0.4543	4	3	4.633	54
LynA Y32A vs. Y32F	1	1	0	0.06522	4	3	0	54			LynA Y32A vs. Y32F	2.533	1.193	1.339	0.4543	4	3	4.169	54
LynB vs. LynA K40R	1	1	0	0.06522	4	3	0	54			LynB vs. LynA K40R	2	1.12	0.88	0.4543	4	3	2.739	54
LynB vs. T27A	1	1	0	0.06522	4	3	0	54			LynB vs. T27A	2	1.044	0.9559	0.4543	4	3	2.975	54
LynB vs. Y32F	1	1	0	0.06522	4	3	0	54			LynB vs. Y32F	2	1.193	0.807	0.4543	4	3	2.512	54
LynA K40R vs. T27A	1	1	0	0.06972	3	3	0	54			LynA K40R vs. T27A	1.12	1.044	0.07589	0.4857	3	3	0.221	54
LynA K40R vs. Y32F	1	1	0	0.06972	3	3	0	54			LynA K40R vs. Y32F	1.12	1.193	-0.07303	0.4857	3	3	0.2126	54
T27A vs. Y32F	1	1	0	0.06972	3	3	0	54			T27A vs. Y32F	1.044	1.193	-0.1489	0.4857	3	3	0.4336	54
Row 2											Row 2
LynA vs. LynA Y32A	0.6263	0.914	-0.2877	0.05352	7	4	7.602	54			LynA vs. LynA Y32A	0.626	2.385	-1.759	0.3728	7	4	6.672	54
LynA vs. LynB	0.6263	0.899	-0.2727	0.05352	7	4	7.205	54			LynA vs. LynB	0.626	1.803	-1.176	0.3728	7	4	4.462	54
LynA vs. LynA K40R	0.6263	0.6247	0.001646	0.05892	7	3	0.03951	54			LynA vs. LynA K40R	0.626	0.7	-0.07397	0.4105	7	3	0.2548	54
LynA vs. T27A	0.6263	0.5525	0.07377	0.05892	7	3	1.77	54			LynA vs. T27A	0.626	0.5468	0.07927	0.4105	7	3	0.2731	54
LynA vs. Y32F	0.6263	0.9193	-0.293	0.05892	7	3	7.031	54			LynA vs. Y32F	0.626	1.09	-0.4635	0.4105	7	3	1.597	54
LynA Y32A vs. LynB	0.914	0.899	0.015	0.06038	4	4	0.3513	54			LynA Y32A vs. LynB	2.385	1.803	0.5825	0.4206	4	4	1.958	54
LynA Y32A vs. LynA K40R	0.914	0.6247	0.2893	0.06522	4	3	6.274	54			LynA Y32A vs. LynA K40R	2.385	0.7	1.685	0.4543	4	3	5.245	54
LynA Y32A vs. T27A	0.914	0.5525	0.3615	0.06522	4	3	7.838	54			LynA Y32A vs. T27A	2.385	0.5468	1.838	0.4543	4	3	5.722	54
LynA Y32A vs. Y32F	0.914	0.9193	-0.005283	0.06522	4	3	0.1146	54			LynA Y32A vs. Y32F	2.385	1.09	1.295	0.4543	4	3	4.032	54
LynB vs. LynA K40R	0.899	0.6247	0.2743	0.06522	4	3	5.949	54			LynB vs. LynA K40R	1.803	0.7	1.103	0.4543	4	3	3.432	54
LynB vs. T27A	0.899	0.5525	0.3465	0.06522	4	3	7.513	54			LynB vs. T27A	1.803	0.5468	1.256	0.4543	4	3	3.909	54
LynB vs. Y32F	0.899	0.9193	-0.02028	0.06522	4	3	0.4398	54			LynB vs. Y32F	1.803	1.09	0.713	0.4543	4	3	2.219	54
LynA K40R vs. T27A	0.6247	0.5525	0.07212	0.06972	3	3	1.463	54			LynA K40R vs. T27A	0.7	0.5468	0.1532	0.4857	3	3	0.4462	54
LynA K40R vs. Y32F	0.6247	0.9193	-0.2946	0.06972	3	3	5.976	54			LynA K40R vs. Y32F	0.7	1.09	-0.3895	0.4857	3	3	1.134	54
T27A vs. Y32F	0.5525	0.9193	-0.3667	0.06972	3	3	7.439	54			T27A vs. Y32F	0.5468	1.09	-0.5428	0.4857	3	3	1.58	54
Row 3											Row 3
LynA vs. LynA Y32A	0.5361	0.8765	-0.3404	0.05352	7	4	8.995	54			LynA vs. LynA Y32A	0.5356	2.253	-1.717	0.3728	7	4	6.512	54
LynA vs. LynB	0.5361	0.8468	-0.3107	0.05352	7	4	8.209	54			LynA vs. LynB	0.5356	1.685	-1.149	0.3728	7	4	4.36	54
LynA vs. LynA K40R	0.5361	0.4983	0.03774	0.05892	7	3	0.9057	54			LynA vs. LynA K40R	0.5356	0.53	0.005642	0.4105	7	3	0.01944	54
LynA vs. T27A	0.5361	0.3666	0.1695	0.05892	7	3	4.067	54			LynA vs. T27A	0.5356	0.3977	0.138	0.4105	7	3	0.4753	54
LynA vs. Y32F	0.5361	0.7347	-0.1987	0.05892	7	3	4.768	54			LynA vs. Y32F	0.5356	0.8783	-0.3427	0.4105	7	3	1.181	54
LynA Y32A vs. LynB	0.8765	0.8468	0.02975	0.06038	4	4	0.6968	54			LynA Y32A vs. LynB	2.253	1.685	0.5675	0.4206	4	4	1.908	54
LynA Y32A vs. LynA K40R	0.8765	0.4983	0.3782	0.06522	4	3	8.2	54			LynA Y32A vs. LynA K40R	2.253	0.53	1.723	0.4543	4	3	5.362	54
LynA Y32A vs. T27A	0.8765	0.3666	0.5099	0.06522	4	3	11.06	54			LynA Y32A vs. T27A	2.253	0.3977	1.855	0.4543	4	3	5.774	54
LynA Y32A vs. Y32F	0.8765	0.7347	0.1418	0.06522	4	3	3.074	54			LynA Y32A vs. Y32F	2.253	0.8783	1.374	0.4543	4	3	4.277	54
LynB vs. LynA K40R	0.8468	0.4983	0.3484	0.06522	4	3	7.555	54			LynB vs. LynA K40R	1.685	0.53	1.155	0.4543	4	3	3.595	54
LynB vs. T27A	0.8468	0.3666	0.4802	0.06522	4	3	10.41	54			LynB vs. T27A	1.685	0.3977	1.287	0.4543	4	3	4.007	54
LynB vs. Y32F	0.8468	0.7347	0.112	0.06522	4	3	2.429	54			LynB vs. Y32F	1.685	0.8783	0.8067	0.4543	4	3	2.511	54
LynA K40R vs. T27A	0.4983	0.3666	0.1317	0.06972	3	3	2.672	54			LynA K40R vs. T27A	0.53	0.3977	0.1323	0.4857	3	3	0.3853	54
LynA K40R vs. Y32F	0.4983	0.7347	-0.2364	0.06972	3	3	4.795	54			LynA K40R vs. Y32F	0.53	0.8783	-0.3483	0.4857	3	3	1.014	54
T27A vs. Y32F	0.3666	0.7347	-0.3681	0.06972	3	3	7.467	54			T27A vs. Y32F	0.3977	0.8783	-0.4807	0.4857	3	3	1.4	54
