# Supplementary material for: Unique-region phosphorylation targets LynA for rapid degradation, tuning its expression and signaling in myeloid cells
Source: eLife journal article supplement (doi:10.7554/elife.46043), 2019-07-08
Supplement: supp [file elife-46043-supp-v1.zip › elife_poa_e46043_Figure_3_source_data_1.xlsx]

## Sheet: Sheet1
Cbl overexpression
	LynA + c-Cbl				LynA + Cbl-b
c-Cbl	1.778	3.906	3.593	2.061	1.162	1.068	1.039	1.319
Cbl-b	0.983	1.069	1.084	0.905	7.335	39.823	46.74	6.125
20180807
20180820
*20170115
*20180120
LynA protein levels during 3-IB-PP1 treatment after Cbl overexpression (norm to each condition)
	Time (min)	LynA					LynA+ c-Cbl					LynA + Cbl-b
	0	1	1	1	1	1	1	1	1	1	1	1	1	1	1	1
	5	1.203	1.149	1.3	0.861	0.866	0.799	0.544	0.6	0.713	0.682	1.597	1.146	0.9	0.734	0.744
	20	0.997	1.179	1.3	0.826	0.757	0.658	0.534	0.4	0.718	0.683	1.494	0.922	1	0.586	0.59
20170103	avg 5 min	1.0758	0.201221				0.6676	0.0992235				1.0242	0.360932
20170115	1-avg	-0.0758					0.3324					-0.0242
20180121
20180807
20180820
LynA protein levels during 3-IB-PP1 treatment, mutation analysis (norm to each condition)
Time (min)	LynA							LynA Y32A							LynB							LynA K40R							T27A							Y32F
	20180313 Y1	20180313 Y2	20180313 Y3	20180313 Y4	042818	20180819	20180820	20180313 Y1	20180313 Y2	20180313 Y3	20180313 Y4	042818	20180819	20180820	20180313 Y1	20180313 Y2	20180313 Y3	20180313 Y4	042818	20180819	20180820	20180313 Y1	20180313 Y2	20180313 Y3	20180313 Y4	042818	20180819	20180820	20180313 Y1	20180313 Y2	20180313 Y3	20180313 Y4	042818	20180819	20180820	20180313 Y1	20180313 Y2	20180313 Y3	20180313 Y4	042818	20180819	20180820
0	1	1	1	1	1	1	1	1	1	1	1				1	1	1	1				1	1	1									1	1	1					1	1	1
5	0.817	0.531	0.66	0.567	0.56219	0.563	0.684	1.066	0.794	0.965	0.831				1.114	0.737	0.842	0.903				0.71	0.473	0.691									0.654637	0.515	0.488					0.95985	0.978	0.82
20	0.648	0.571	0.602	0.499	0.399495	0.474	0.559	0.983	0.941	0.791	0.791				0.991	0.715	0.811	0.87				0.438	0.422	0.635									0.321788	0.391	0.387					0.731206	0.732	0.741
Within each row, compare columns (simple effects within rows)												Compare each cell mean with the other cell mean in that row
Number of families	3											Number of families	1
Number of comparisons per family	3											Number of comparisons per family	2
Alpha	0.05											Alpha	0.05
Tukey's multiple comparisons test	Mean Diff.	95.00% CI of diff.	Significant?	Summary	Adjusted P Value							Sidak's multiple comparisons test	Mean Diff.	95.00% CI of diff.	Significant?	Summary	Adjusted P Value
20170103												LynA + c-Cbl - LynA + Cbl-b
LynA vs. LynA+ c-Cbl	0	-0.3216 to 0.3216	No	ns	>0.9999							c-Cbl	1.688	-20.54 to 23.92	No	ns	0.971
LynA vs. LynA + Cbl-b	0	-0.3216 to 0.3216	No	ns	>0.9999							Cbl-b	-24	-46.23 to -1.764	Yes	*	0.0372
LynA+ c-Cbl vs. LynA + Cbl-b	0	-0.3216 to 0.3216	No	ns	>0.9999
20170115												Test details	Mean 1	Mean 2	Mean Diff.	SE of diff.	N1	N2	t	DF
LynA vs. LynA+ c-Cbl	0.4082	0.08660 to 0.7298	Yes	*	0.0102
LynA vs. LynA + Cbl-b	0.0516	-0.2700 to 0.3732	No	ns	0.9189							LynA + c-Cbl - LynA + Cbl-b
LynA+ c-Cbl vs. LynA + Cbl-b	-0.3566	-0.6782 to -0.03500	Yes	*	0.027							c-Cbl	2.835	1.147	1.688	7.514	4	4	0.2246	6
												Cbl-b	1.01	25.01	-24	7.514	4	4	3.194	6
20180121
LynA vs. LynA+ c-Cbl	0.4132	0.09160 to 0.7348	Yes	**	0.0092
LynA vs. LynA + Cbl-b	0.0934	-0.2282 to 0.4150	No	ns	0.7593
LynA+ c-Cbl vs. LynA + Cbl-b	-0.3198	-0.6414 to 0.001796	No	ns	0.0515
Test details	Mean 1	Mean 2	Mean Diff.	SE of diff.	N1	N2	q	DF
20170103
LynA vs. LynA+ c-Cbl	1	1	0	0.1316	5	5	0	36
LynA vs. LynA + Cbl-b	1	1	0	0.1316	5	5	0	36
LynA+ c-Cbl vs. LynA + Cbl-b	1	1	0	0.1316	5	5	0	36
20170115
LynA vs. LynA+ c-Cbl	1.076	0.6676	0.4082	0.1316	5	5	4.388	36
LynA vs. LynA + Cbl-b	1.076	1.024	0.0516	0.1316	5	5	0.5546	36
LynA+ c-Cbl vs. LynA + Cbl-b	0.6676	1.024	-0.3566	0.1316	5	5	3.833	36
20180121
LynA vs. LynA+ c-Cbl	1.012	0.5986	0.4132	0.1316	5	5	4.441	36
LynA vs. LynA + Cbl-b	1.012	0.9184	0.0934	0.1316	5	5	1.004	36
LynA+ c-Cbl vs. LynA + Cbl-b	0.5986	0.9184	-0.3198	0.1316	5	5	3.437	36
