# Supplementary material for: Unique-region phosphorylation targets LynA for rapid degradation, tuning its expression and signaling in myeloid cells
Source: eLife journal article supplement (doi:10.7554/elife.46043), 2019-07-08
Supplement: supp [file elife-46043-supp-v1.zip › elife_poa_e46043_Figure_4_figure_supplement_1_Source_Data_1.xlsx]

## Sheet: expt 1 (fig)
BSA std curve densitometry
ug BSA	signal
20	28.3
15	23.3
10	12
5	8.14
0.5	3.14
0.125	1.68
0.05	0.318
		y = 0.09035x + 1.13702 (from Prism)
whole lane	Signal	ug total protein (calc)
Resting	28.6	20.1918
3-IB-PP1-treated	28	19.7509

## Sheet: expt 2
BSA std curve densitometry
ug BSA	signal
40	57.7
0.4	1.31
0.04	0.342
y = 0.6994x - 0.3563 (from Prism)
whole lane	Signal	ug total protein (calc)
Resting	45.2	65.1363
3-IB-PP1-treated	55.4	79.7202
