# Supplementary material for: Unique-region phosphorylation targets LynA for rapid degradation, tuning its expression and signaling in myeloid cells
Source: eLife journal article supplement (doi:10.7554/elife.46043), 2019-07-08
Supplement: supp [file elife-46043-supp-v1.zip › elife_poa_e46043_Figure_4_figure_supplement_5_source_data_1.xlsx]

## Sheet: Calibration Curve
Skyline results for total area under the curve for each peptide and various charge states.
	2+ Charge Peak Area	3+ Charge Peak Area	2+ Charge Peak Area	3+ Charge Peak Area	2+ Charge Peak Area	3+ Charge Peak Area		2+ charge	Average 2+ Charge	3+ charge	Average 3+ Charge
	TIYVRDPTSNK (647.3435 m/z)	TIYVRDPTSNK (431.8981 m/z)	TIY[+80]VRDPTSNK (687.3266) m/z)	TIY[+80]VRDP(C13N15)TSNK (458.5535)	TIY[+80]VRDP(C13N15)TSNK (690.3336 m/z)	TIY[+80]VRDP(C13N15)TSNK (460.5581 m/z)	unmodified Y32 contamination (%)	Ratio pY32/pY32*	Ratio pY32/pY32*	Ratio pY32/pY32*	Ratio pY32/pY32*
light 1_17363_CalCurv_Y32_unlabeleledvslabeled_pt1to1_01 Total Area	0	0	1957513	1036170	15169367	3895261	0	0.129044		0.266008
light 6_17363_CalCurv_Y32_unlabeleledvslabeled_pt1to1_02 Total Area	0	9274	2370547	1317377	17299666	4586589	0	0.137028		0.287224
light 6_17363_CalCurv_Y32_unlabeleledvslabeled_pt1to1_03 Total Area	0	0	1519457	730277	11506972	2499886	0	0.132047		0.292124
								Average	0.132706	Average	0.281785
light 6_17363_CalCurv_Y32_unlabeleledvslabeled_pt25to1 Total Area	8027	0	3724348	2102695	11203213	2929492	0.215528	0.332436		0.717768
light 6_17363_CalCurv_Y32_unlabeleledvslabeled_pt25to1_02 Total Area	0	8461	7343004	4170192	24871256	6647036	0	0.295241		0.627376
light 6_17363_CalCurv_Y32_unlabeleledvslabeled_pt25to1_03 Total Area	0	10308	5960194	2549349	18810826	4068770	0	0.316849		0.626565
								Average	0.314842	Average	0.657236
light 6_17363_CalCurv_Y32_unlabeleledvslabeled_pt5to1_02 Total Area	8769	73520	15264996	8647706	20119340	5031444	0.0574452	0.758723		1.71873
light 6_17363_CalCurv_Y32_unlabeleledvslabeled_pt5to1_03 Total Area	0	30360	12485975	7628062	17002988	3707056	0	0.73434		2.05771
								Average	0.746531	Average	1.88822
light 6_17363_CalCurv_Y32_unlabeleledvslabeled_pt6to1 Total Area	0	0	5026813	2722965	6067188	1563543	0	0.828524		1.74154
light 6_17363_CalCurv_Y32_unlabeleledvslabeled_pt6to1_02 Total Area	0	22418	9563587	5557735	11299717	2952774	0	0.846356		1.88221
light 6_17363_CalCurv_Y32_unlabeleledvslabeled_pt6to1_03 Total Area	8844	0	6805242	3158064	8018540	1434270	0.129959	0.848688		2.20186
								Average	0.84119	Average	1.94187
light 6_17363_CalCurv_Y32_unlabeleledvslabeled_pt75to1 Total Area	0	28543	10654720	6205758	8856206	2577098	0	1.20308		2.40804
light 6_17363_CalCurv_Y32_unlabeleledvslabeled_pt75to1_02 Total Area	0	73431	17418312	11071268	14978067	4028294	0	1.16292		2.74838
light 6_17363_CalCurv_Y32_unlabeleledvslabeled_pt75to1_03 Total Area	0	47181	12040445	4926101	9948139	1935122	0	1.21032		2.54563
								Average	1.19211	Average	2.56735
light 1_17363_CalCurv_Y32_unlabeleledvslabeled_1to1_01 Total Area	9029	114450	27944070	14939321	20719820	4844149	0.032311	1.34866		3.08399
light 6_17363_CalCurv_Y32_unlabeleledvslabeled_1to1_02 Total Area	17871	129820	20574978	15129786	15121080	4425432	0.0868579	1.36068		3.41883
light 6_17363_CalCurv_Y32_unlabeleledvslabeled_1to1_03 Total Area	0	82468	13628982	5185678	9997455	1793019	0	1.36325		2.89215
								Average	1.35753	Average	3.13166
light 6_17363_CalCurv_Y32_unlabeleledvslabeled_1pt25to1 Total Area	0	78599	14199650	8695314	8226273	2233898	0	1.72613		3.89244
light 6_17363_CalCurv_Y32_unlabeleledvslabeled_1pt25to1_02 Total Area	0	143775	25689320	19133464	13845922	4167463	0	1.85537		4.59115
light 6_17363_CalCurv_Y32_unlabeleledvslabeled_1pt25to1_03 Total Area	8078	101049	16926492	10699387	9523678	2569254	0.047724	1.77731		4.16439
								Average	1.78627	Average	4.216
light 1_17363_CalCurv_Y32_unlabeleledvslabeled_1pt5to1	0	0	354895	747727	143728	246002	0	2.46921		3.03952
light 1_17363_CalCurv_Y32_unlabeleledvslabeled_1pt5to1_01	46139	388707	48802240	24422872	20353610	4835519	0.0945428	2.39772		5.05072
light 6_17363_CalCurv_Y32_unlabeleledvslabeled_1pt5to1 Total Area	9873	169060	20533498	12483723	9209630	2036708	0.0480824	2.22957		6.12936
light 6_17363_CalCurv_Y32_unlabeleledvslabeled_1pt5to1_02 Total Area	8151	116422	34034768	23135498	14472300	4012583	0.023949	2.35172		5.76574
light 6_17363_CalCurv_Y32_unlabeleledvslabeled_1pt5to1_20190607195921 Total Area	10799	164026	20428532	11854042	8908922	2375806	0.0528623	2.29304		4.98948
								Average	2.34825	Average	4.99496
								Notes
			Average of Calibration Curve, 2+ Charge State Only			Numbers were generated from taking the average peak area ratios at a given molar ratio above. This calibration curve is more precise and %CV are lower. We will use this one for calculations.		Column H should only illustrate contamination of unmodified and/or the degradation of pY32 to unmodified Y32
			Molar Ratio [pY32/pY32*]	Peak Area Ratio (pY32/pY32*)	Standard Deviation
			0.1	0.132706	0.004033
			0.25	0.314842	0.0186786
			0.5	0.746531	0.017241
			0.6	0.84119	0.0110303
			0.75	1.19211	0.025534			Column I: Calculation takes the peak area of 2+ charge TIY[+80]VRDPTSNK (687.3266) m/z) and divides by peak area of 2+ of TIY[+80]VRDP(C13N15)TSNK (690.3336 m/z).
			1	1.35753	0.00778483
			1.25	1.78627	0.0650831
			1.5	2.34825	0.0924993
			Average of Calibration Curve, 3+ Charge State Only
			Molar Ratio [pY32/pY32*]	Peak Area Ratio (pY32/pY32*)	Standard Deviation
			0.1	0.281785	0.0138816
			0.25	0.657236	0.0524234
			0.5	1.88822	0.239696
			0.6	1.94187	0.235891
			0.75	2.56735	0.171204
			1	3.13166	0.266554
			1.25	4.216	0.352204
			1.5	4.99496	1.19456

## Sheet: Average Calibration Curve Graph
	Calibration Curve for Macrophage Studies (2+ Charge)
	[pY32/pY32*] Ratio	Peak Ratio	Standard Deviation	%CV
	0.1	0.132706	0.004033	3.03904
	0.25	0.314842	0.0186786	5.9327
	0.5	0.746531	0.017241	2.30948
	0.6	0.84119	0.0110303	1.31128
	0.75	1.19211	0.025534	2.14192
	1	1.35753	0.00778483	0.573455
	1.25	1.78627	0.0650831	3.64352
	1.5	2.34825	0.0924993	3.93907

## Sheet: 3+ Charge Cal.
Average of Calibration Curve, 3+ Charge State Only
Molar Ratio [pY32/pY32*]	Peak Area Ratio (pY32/pY32*)	Standard Deviation	%CV
0.1	0.281785	0.0138816	4.92629
0.25	0.657236	0.0524234	7.97633
0.5	1.88822	0.239696	12.6943
0.6	1.94187	0.235891	12.1476
0.75	2.56735	0.171204	6.66852
1	3.13166	0.266554	8.51161
1.25	4.216	0.352204	8.35398
1.5	4.99496	1.19456	23.9152
