# Supplementary material for: Unique-region phosphorylation targets LynA for rapid degradation, tuning its expression and signaling in myeloid cells
Source: eLife journal article supplement (doi:10.7554/elife.46043), 2019-07-08
Supplement: supp [file elife-46043-supp-v1.zip › elife_poa_e46043_Figure_4_figure_supplement_5_Source_Data_2.xlsx]

## Sheet: calibration Curve for pY32vsY32
Peptide Modified Sequence
TIYVRDPTSNK
TIYVRDPTSNK
TIY[+80]VRDPTSNK
TIY[+80]VRDPTSNK
		2+ charge state	3+ charge state	2+ charge state	3+ charge state	2+ charge state	2+ charge state	2+ charge state	2+ charge state	3+ charge state	3+ charge state
	Molar Ratio [pY32/unmodified-Y32	TIYVRDPTSNK (647.343509 m/z)	TIYVRDPTSNK (431.898098 m/z)	TIY[+80]VRDPTSNK (687.326674 m/z)	TIY[+80]VRDPTSNK (458.553541 m/z)	Peak Area pY32/unmodified-Y32	Peak Area (pY32/Y32) Average	Peak Area (pY32/Y32) STD	Peak Area (pY32/Y32) %CV	Peak Area pY32/Y32	Peak Area (pY32/Y32) Average
light pY32_unmodifiedY32_pt01to1_rep1 Total Area	0.01	328925248	1335746688	11034630	9194911	0.0335475				0.00688372
light pY32_unmodifiedY32_pt01to1_rep2 Total Area	0.01	374256576	1355853952	7334945	4687003	0.0195987				0.00345686
light pY32_unmodifiedY32_pt01to1_rep3 Total Area	0.01
							0.0265731				0.00517029
light pY32_unmodifiedY32_pt025to1_rep1 Total Area	0.025	322167872	1235379968	12676678	12089979	0.0393481				0.00978645
light pY32_unmodifiedY32_pt025to1_rep2 Total Area	0.025	309618816	1195002496	9317671	7352533	0.030094				0.00615273
light pY32_unmodifiedY32_pt025to1_rep3 Total Area	0.025
							0.034721				0.00796959
light pY32_unmodifiedY32_pt050to1_rep1 Total Area	0.05	357579456	1284414336	20212538	15117584	0.056526				0.01177
light pY32_unmodifiedY32_pt050to1_rep2 Total Area	0.05	316141760	1221518336	15994190	11808880	0.0505918				0.00966738
light pY32_unmodifiedY32_pt050to1_rep3 Total Area	0.05
							0.0535589				0.0107187
light pY32_unmodifiedY32_pt075to1_rep1 Total Area	0.075	356140256	1352975232	31183252	24357986	0.0875589				0.0180033
light pY32_unmodifiedY32_pt075to1_rep2 Total Area	0.075
light pY32_unmodifiedY32_pt075to1_rep3 Total Area	0.075
							0.0875589				0.0180033
light pY32_unmodifiedY32_pt1to1 Total Area	0.1	112089072	281019232	42485712	17204466	0.379035				0.0612217
light pY32_unmodifiedY32_pt1to1_rep2 Total Area	0.1	237105008	657576896	65421356	26329874	0.275917				0.0400408
light pY32_unmodifiedY32_pt1to1_rep3 Total Area	0.1	151866928	606285824	34030176	24428118	0.224079				0.0402914	0.0471846
							0.249998
light Y32_unmodifiedY32_pt25to1 Total Area	0.25	242335936	589870144	113321480	35828360	0.467621				0.0607394
light pY32_unmodifiedY32_pt125to1_rep2 Total Area	0.25	358467136	1030184896	235668736	100604568	0.657435				0.0976568
light pY32_unmodifiedY32_pt125to1_rep3 Total Area	0.25	237009904	884711808	160998272	116013896	0.679289				0.131132
							0.601448				0.0965094
light Y32_unmodifiedY32_pt5to1 Total Area	0.5	241050352	622650240	252242496	92532176	1.04643				0.14861
light pY32_unmodifiedY32_pt5to1_rep2 Total Area	0.5	360597632	1039908928	372078688	139571584	1.03184				0.134215
light pY32_unmodifiedY32_pt5to1_rep3 Total Area	0.5	263272000	1002656448	255891760	200719168	0.971967				0.200187
							1.01675				0.161004
light Y32_unmodifiedY32_1pt5to1 Total Area	1.5	301202784	776353216	898419136	378590976	2.98277				0.487653
light pY32_unmodifiedY32_1pt5to1_rep2 Total Area	1.5	515789408	1379073920	1270124160	480862400	2.46249				0.348685
	1.5
							2.72263				0.418169
					Low End Calibration Curve (3+ Charge)
Low End Calibration Curve (2+ Charge)					Molar Ratio [pY32/unmodified-Y32]	Peak Area Ratio
Molar Ratio [pY32/unmodified-Y32]	Peak Area Ratio	My instrument started leaking last night not all replicates finished. The curve is constructed out of what points I have the moment. Also, I did not include 0.01 or 0.025 into the curve because those points are not linear in the calibration curve.			0.01	0.00517029
0.01	0.0265731				0.025	0.00796959
0.025	0.034721				0.05	0.0107187
0.05	0.0535589				0.075	0.0180033
0.075	0.0875589				0.1	0.0471846
0.1	0.249998				0.25	0.0965094
0.25	0.601448				0.5	0.161004
0.5	1.01675				1.5	0.418169
1.5	2.72263

## Sheet: Results
Low End Calibration Curve (2+ Charge)
Molar Ratio [pY32/unmodified-Y32]	Peak Area Ratio
0.05	0.0535589
0.075	0.0875589
0.1	0.249998
0.25	0.601448
0.5	1.01675
1.5	2.72263
