# Supplementary material for: Unique-region phosphorylation targets LynA for rapid degradation, tuning its expression and signaling in myeloid cells
Source: eLife journal article supplement (doi:10.7554/elife.46043), 2019-07-08
Supplement: supp [file elife-46043-supp-v1.zip › elife_poa_e46043_Figure_4_figure_supplement_5_Source_Data_3.xlsx]

## Sheet: Skyline LMW_nostim
Peptide Modified Sequence	light Precursor Mz	light nostim_LMW_0529_01 Total Area	light nostim_LMW_0529_rep02 Total Area	light nostim_LMW_0529_rep03 Total Area	light nostim_LMW_0531_rep01 Total Area	light nostim_LMW_0531_rep02 Total Area	light nostim_LMW_0531_rep03 Total Area	heavy Precursor Mz	heavy nostim_LMW_0529_01 Total Area	heavy nostim_LMW_0529_rep02 Total Area	heavy nostim_LMW_0529_rep03 Total Area	heavy nostim_LMW_0531_rep01 Total Area	heavy nostim_LMW_0531_rep02 Total Area	heavy nostim_LMW_0531_rep03 Total Area
TIYVRDPTSNK	647.344	57962792	54950784	62020832	107461448	113416160	130482312	#N/A	#N/A	#N/A	#N/A	#N/A	#N/A	#N/A
TIYVRDPTSNK	431.898	171646272	183072112	173432816	338593600	288145600	312568736	#N/A	#N/A	#N/A	#N/A	#N/A	#N/A	#N/A
T[+80]IYVRDPTSNK	687.327	325772	334472	241906	387510	359836	464066	#N/A	#N/A	#N/A	#N/A	#N/A	#N/A	#N/A
TIY[+80]VRDPTSNK	687.327	360541	360920	239660	418614	430910	533968	690.334	5833694	6148427	6322991	12632571	13494306	13719699
TIY[+80]VRDPTSNK	458.554	168713	176364	122538	375340	169590	346111	460.558	1122396	1388903	1390753	2019139	3091586	4000056
TIYVRDPT[+80]SNK	687.327	0	128339	0	387075	373689	279606	#N/A	#N/A	#N/A	#N/A	#N/A	#N/A	#N/A
TIYVRDPT[+80]SNK	458.554	23608	0	10805	10151	0	0	#N/A	#N/A	#N/A	#N/A	#N/A	#N/A	#N/A
TIYVRDPTS[+80]NK	687.327	41980	128259	134690	387087	10355	279274	#N/A	#N/A	#N/A	#N/A	#N/A	#N/A	#N/A
Peak Area Ratio of 2+ charge state of pY32 to unmodified Y32
2+ charge state	TIYVRDPTSNK (647.3435 m/z)	TIY[+80]VRDPTSNK (687.3267 m/z)	Peak Area Ratio (pY32/unmod Y32)
light no stim_LMW_0529_01	57962792	360541	0.00622021
light no stim_LMW_0529_rep02	54950784	360920	0.00656806
light no stim_LMW_0529_rep03	62020832	239660	0.00386419
light no stim_LMW_0531_rep01	107461448	418614	0.00389548
light no stim_LMW_0531_rep02	113416160	430910	0.00379937
light no stim_LMW_0531_rep03	130482312	533968	0.00409226
Peak Area Ratio of 2+ charge state of pY32 to labeled pY32*					Amount pY32* Spiked	Amount pY32	Amount Protein (mg)	pY32 (fmol)/Lyn (mg)
	TIY[+80]VRDPTSNK (687.3267 m/z)	TIY[+80]VRDP(C13N15)TSNK (690.336 m/z)	Peak Area Ratio (pY32/pY32*)	Calibration Correction	fmol	fmol
light no stim_LMW_0529_01	360541	5833694	0.0618032	0.070289	125	8.78613	19.8	0.443744
light no stim_LMW_0529_rep02	360920	6148427	0.0587012	0.068257	125	8.53213	19.8	0.430916
light no stim_LMW_0529_rep03	239660	6322991	0.0379029	0.0546331	125	6.82914	19.8	0.344906
light no stim_LMW_0531_rep01	418614	12632571	0.0331377	0.0515116	125	6.43896	79.72	0.0807696
light no stim_LMW_0531_rep02	430910	13494306	0.0319327	0.0507223	125	6.34029	79.72	0.079532
light no stim_LMW_0531_rep03	533968	13719699	0.0389198	0.0552992	125	6.9124	79.72	0.0867085
Peak Area Ratio of 3+ Charge State of pY32 to unmodified Y32
3+ charge state	TIYVRDPTSNK (647.3435 m/z)	TIY[+80]VRDPTSNK (687.3267 m/z)	Peak Area Ratio (pY32/unmod Y32)
light no stim_LMW_0529_01	171646272	168713	0.000982911
light no stim_LMW_0529_rep02	183072112	176364	0.000963358
light no stim_LMW_0529_rep03	173432816	122538	0.000706544
light no stim_LMW_0531_rep01	338593600	375340	0.00110853
light no stim_LMW_0531_rep02	288145600	169590	0.000588557
light no stim_LMW_0531_rep03	312568736	346111	0.00110731
Peak Area Ratio of 3+ Charge State of pY32 to labeled pY32					Amount pY32* Spiked	Amount pY32	Amount Protein (mg)	pY32 (fmol)/Lyn (mg)
	TIY[+80]VRDPTSNK (687.3267 m/z)	TIY[+80]VRDP(C13N15)TSNK (690.336 m/z)	Peak Area Ratio (pY32/pY32*)	Calibration Correction	fmol	fmol
light no stim_LMW_0529_01	168713	1122396	0.150315	0.0564842	125	7.06052	19.8	0.356592
light no stim_LMW_0529_rep02	176364	1388903	0.126981	0.0495405	125	6.19256	19.8	0.312756
light no stim_LMW_0529_rep03	122538	1390753	0.0881091	0.0379732	125	4.74666	19.8	0.23973
light no stim_LMW_0531_rep01	375340	2019139	0.185891	0.0670707	125	8.38384	79.72	0.105166
light no stim_LMW_0531_rep02	169590	3091586	0.0548553	0.0280778	125	3.50972	79.72	0.0440256
light no stim_LMW_0531_rep03	346111	4000056	0.0865265	0.0375023	125	4.68779	79.72	0.0588032

## Sheet: LMW no stim
Peak Area Ratio of 2+ charge state of pY32 to unmodified Y32
2+ charge state	TIYVRDPTSNK (647.3435 m/z)	TIY[+80]VRDPTSNK (687.3267 m/z)	Peak Area Ratio (pY32/unmod Y32)	calibration Correction					This would require a whole new kind of calibration curve. If we can we should stick to comparing pY32/pY32*.
light no stim_LMW_0529_01	57962792	360541	0.00622021
light no stim_LMW_0529_rep02	54950784	360920	0.00656806
light no stim_LMW_0529_rep03	62020832	239660	0.00386419	0.00555082
light no stim_LMW_0531_rep01	107461448	418614	0.00389548
light no stim_LMW_0531_rep02	113416160	430910	0.00379937
light no stim_LMW_0531_rep03	130482312	533968	0.00409226	0.00392904
Peak Area Ratio of 2+ charge state of pY32 to labeled pY32*					Amount pY32* Spiked	Amount pY32	Amount Protein (mg)	pY32 (fmol)/Lyn (mg)	Average	STD	%CV
	TIY[+80]VRDPTSNK (687.3267 m/z)	TIY[+80]VRDP(C13N15)TSNK (690.336 m/z)	Peak Area Ratio (pY32/pY32*)	Calibration Correction	fmol	fmol							CVs are higher but that is because there is not much pY32 in the sample
light no stim_LMW_0529_01	360541	5833694	0.0618032	0.070289	125	8.78613	20.2	0.434957
light no stim_LMW_0529_rep02	360920	6148427	0.0587012	0.068257	125	8.53213	20.2	0.422383
light no stim_LMW_0529_rep03	239660	6322991	0.0379029	0.0546331	125	6.82914	20.2	0.338076	0.398472	0.0526806	13.2207
											#DIV/0!
light no stim_LMW_0531_rep01	418614	12632571	0.0331377	0.0515116	125	6.43896	65.13	0.0988631			#DIV/0!
light no stim_LMW_0531_rep02	430910	13494306	0.0319327	0.0507223	125	6.34029	65.13	0.0973483			#DIV/0!
light no stim_LMW_0531_rep03	533968	13719699	0.0389198	0.0552992	125	6.9124	65.13	0.106132	0.100781	0.00469571	4.65931
Peak Area Ratio of 3+ Charge State of pY32 to unmodified Y32
3+ charge state	TIYVRDPTSNK (647.3435 m/z)	TIY[+80]VRDPTSNK (687.3267 m/z)	Peak Area Ratio (pY32/unmod Y32)	Average
light no stim_LMW_0529_01	171646272	168713	0.000982911
light no stim_LMW_0529_rep02	183072112	176364	0.000963358
light no stim_LMW_0529_rep03	173432816	122538	0.000706544	0.000884271
light no stim_LMW_0531_rep01	338593600	375340	0.00110853
light no stim_LMW_0531_rep02	288145600	169590	0.000588557
light no stim_LMW_0531_rep03	312568736	346111	0.00110731	0.000934798
Peak Area Ratio of 3+ Charge State of pY32 to labeled pY32					Amount pY32* Spiked	Amount pY32	Amount Protein (mg)	pY32 (fmol)/Lyn (mg)	Average	STD	%CV
	TIY[+80]VRDPTSNK (687.3267 m/z)	TIY[+80]VRDP(C13N15)TSNK (690.336 m/z)	Peak Area Ratio (pY32/pY32*)	Calibration Correction	fmol	fmol
light no stim_LMW_0529_01	168713	1122396	0.150315	0.0564842	125	7.06052	20.2	0.349531
light no stim_LMW_0529_rep02	176364	1388903	0.126981	0.0495405	125	6.19256	20.2	0.306562
light no stim_LMW_0529_rep03	122538	1390753	0.0881091	0.0379732	125	4.74666	20.2	0.234983	0.297025	0.0578663	19.482
light no stim_LMW_0531_rep01	375340	2019139	0.185891	0.0670707	125	8.38384	65.13	0.128725
light no stim_LMW_0531_rep02	169590	3091586	0.0548553	0.0280778	125	3.50972	65.13	0.0538879
light no stim_LMW_0531_rep03	346111	4000056	0.0865265	0.0375023	125	4.68779	65.13	0.0719759	0.0848628	0.0390473	117.905

## Sheet: Results
pY32 vs pY32* LMW Unstimulated
Average of 3 technical replicates	pY32 (fmol)/Lyn (mg)	STD	%CV
Unstimulated LMW 0529	0.398472	0.0526806	13.2207
Unstimulated LMW 031	0.100781	0.00469571	4.65931
