# Supplementary material for: Unique-region phosphorylation targets LynA for rapid degradation, tuning its expression and signaling in myeloid cells
Source: eLife journal article supplement (doi:10.7554/elife.46043), 2019-07-08
Supplement: supp [file elife-46043-supp-v1.zip › elife_poa_e46043_Figure_4_figure_supplement_5_Source_Data_4.xlsx]

## Sheet: Ben's Export List_HMW_nostim
Peptide Modified Sequence	light Precursor Mz	Charge state
TIYVRDPTSNK	647.344	2
TIYVRDPTSNK	431.898	3
TIY[+80]VRDPTSNK	687.327	2
TIY[+80]VRDPTSNK	458.554	3
TIY[+80]VRDP(c13N15)TSNK	690.334
TIY[+80]VRDP(c13N15)TSNK	460.558
	TIYVRDPTSNK	TIYVRDPTSNK	TIY[+80]VRDPTSNK (+2)	TIY[+80]VRDPTSNK (+3)	TIY[+80]VRDP(c13N15)TSNK (+2)	TIY[+80]VRDP(c13N15)TSNK (+3)	Ratio (pY32vpY32*) 2+
light nostim_HMW_0529_01 Total Area	1679187	5185725	9167	7798658	7343	671383	1.2484
light nostim_HMW_0529_rep02 Total Area	1637741	4706194	0	2215304	0	125848	#DIV/0!
light nostim_HMW_0529_rep03 Total Area	1621709	4368529	0	3938595	107251	33836	0
							#DIV/0!
light nostim_HMW_0529_rep04 Total Area	2266580	4629574	0	10093739	50159	493683	0
light nostim_HMW_0531_rep01 Total Area	5948341	12479082	27972	16611204	0	343769	#DIV/0!
light nostim_HMW_0531_rep02 Total Area	6522520	12760547	50915	2362100	1119	59389	45.5004
						Not quantitiative
