# Supplementary material for: Unique-region phosphorylation targets LynA for rapid degradation, tuning its expression and signaling in myeloid cells
Source: eLife journal article supplement (doi:10.7554/elife.46043), 2019-07-08
Supplement: supp [file elife-46043-supp-v1.zip › elife_poa_e46043_Figure_4_figure_supplement_5_source_data_5.xlsx]

## Sheet: Skyline LMW_stim
Peptide Modified Sequence	light Precursor Mz	light stim_LMW_0529_rep01 Total Area	light stim_LMW_0529_rep02 Total Area	light stim_LMW_0529_rep03 Total Area	light stim_LMW_0531_rep01 Total Area	light stim_LMW_0531_rep02 Total Area	light stim_LMW_0531_rep03 Total Area	heavy Precursor Mz	heavy stim_LMW_0529_rep01 Total Area	heavy stim_LMW_0529_rep02 Total Area	heavy stim_LMW_0529_rep03 Total Area	heavy stim_LMW_0531_rep01 Total Area	heavy stim_LMW_0531_rep02 Total Area	heavy stim_LMW_0531_rep03 Total Area
TIYVRDPTSNK	647.344	56120344	51113292	54886752	74359456	84043864	93213296	#N/A	#N/A	#N/A	#N/A	#N/A	#N/A	#N/A
TIYVRDPTSNK	431.898	177072864	167305408	169016928	230301808	221441328	247039600	#N/A	#N/A	#N/A	#N/A	#N/A	#N/A	#N/A
T[+80]IYVRDPTSNK	687.327	6397291	7303199	6528969	6798894	7069644	6602777	#N/A	#N/A	#N/A	#N/A	#N/A	#N/A	#N/A
TIY[+80]VRDPTSNK	687.327	6720728	7701477	6894883	7678516	7337825	7561948	690.334	6447222	6773717	6113297	12923469	12871387	13350427
TIY[+80]VRDPTSNK	458.554	3489603	3989060	3807727	3543511	3439181	3659532	460.558	1428305	1634164	1542420	2945827	3026603	2865551
TIYVRDPT[+80]SNK	687.327	0	0	0	0	8064	34915	#N/A	#N/A	#N/A	#N/A	#N/A	#N/A	#N/A
TIYVRDPT[+80]SNK	458.554	12021	412589	453156	51498	0	0	#N/A	#N/A	#N/A	#N/A	#N/A	#N/A	#N/A
TIYVRDPTS[+80]NK	687.327	10894	48504	59374	21334	8063	34918	#N/A	#N/A	#N/A	#N/A	#N/A	#N/A	#N/A
Peak Area Ratio of 2+ charge state of pY32 to unmodified Y32
2=+ charge state	TIYVRDPTSNK	TIY[+80]VRDPTSNK	ratio pY32/unmod Y32
light stim_LMW_0529_rep01	56120344	6720728	0.119756
light stim_LMW_0529_rep02	51113292	7701477	0.150675
light stim_LMW_0529_rep03	54886752	6894883	0.12562
light stim_LMW_0531_rep01	74359456	7678516	0.103262
light stim_LMW_0531_rep02	84043864	7337825	0.0873095
light stim_LMW_0531_rep03	93213296	7561948	0.0811252
Peak Area Ratio of 2+ charge state of pY32 to labeled pY32
light stim_LMW_0529_01	6720728	6447222	0.959304
light stim_LMW_0529_rep02	7701477	6773717	0.879535
light stim_LMW_0529_rep03	6894883	6113297	0.886643
light stim_LMW_0531_rep01	7678516	12923469	1.68307
light stim_LMW_0531_rep02	7337825	12871387	1.75411
light stim_LMW_0531_rep03	7561948	13350427	1.76547
Peak Area Ratio of 3+ Charge State pY32 to unmodified Y32
3+ charge state	TIYVRDPTSNK	TIY[+80]VRDPTSNK	ratio pY32/unmod Y32
light stim_LMW_0529_rep01	177072864	3489603	0.0197072
light stim_LMW_0529_rep02	167305408	3989060	0.023843
light stim_LMW_0529_rep03	169016928	3807727	0.0225287
light stim_LMW_0531_rep01	230301808	3543511	0.0153864
light stim_LMW_0531_rep02	221441328	3439181	0.0155309
light stim_LMW_0531_rep03	247039600	3659532	0.0148135
Peak Area Ratio of pY32 to labeled pY32
light stim_LMW_0529_01	3489603	1428305	2.44318
light stim_LMW_0529_rep02	3989060	1634164	2.44104
light stim_LMW_0529_rep03	3807727	1542420	2.46867
light stim_LMW_0531_rep01	7678516	2945827	2.60657
light stim_LMW_0531_rep02	7337825	3026603	2.42444
light stim_LMW_0531_rep03	7561948	2865551	2.63892
Peak Area Ratio of both 2+ and 3+ Charge States of pY32 to unmodified Y32
Average of 2+, 3+ charge states	TIYVRDPTSNK	TIY[+80]VRDPTSNK	ratio pY32/unmod Y32
light stim_LMW_0529_rep01	233193208	10210331	0.0437849
light stim_LMW_0529_rep02	218418700	11690537	0.0535235
light stim_LMW_0529_rep03	223903680	10702610	0.0478001
light stim_LMW_0531_rep01	304661264	11222027	0.0368344
light stim_LMW_0531_rep02	305485192	10777006	0.0352783
light stim_LMW_0531_rep03	340252896	11221480	0.0329798
Peak Area Ratio of both 2+ and 3+ charge states of pY32 to labeled pY32
light stim_LMW_0529_01	10210331	7875527	1.29646
light stim_LMW_0529_rep02	11690537	8407881	1.39043
light stim_LMW_0529_rep03	10702610	7655717	1.39799
light stim_LMW_0531_rep01	15357032	15869296	0.96772
light stim_LMW_0531_rep02	14675650	15897990	0.923114
light stim_LMW_0531_rep03	15123896	16215978	0.932654

## Sheet: LMW Stim
Peak Area Ratio of 2+ charge state of pY32 to unmodified Y32
2+ charge state	TIYVRDPTSNK (647.3435 m/z)	TIY[+80]VRDPTSNK (687.3267 m/z)	Peak Area Ratio (pY32/unmod Y32)	Calibration Correction (pY32/unmodified Y32)	Average	STD	%CV		Peak Area Ratio of pY32 and unmodified Y32
light stim_LMW_0529_rep01	56120344	6720728	0.119756	0.0432041
light stim_LMW_0529_rep02	51113292	7701477	0.150675	0.0602742
light stim_LMW_0529_rep03	54886752	6894883	0.12562	0.0464419	0.0499734	0.00906645	18.1425
light stim_LMW_0531_rep01	74359456	7678516	0.103262	0.0340982
light stim_LMW_0531_rep02	84043864	7337825	0.0873095	0.0252909
light stim_LMW_0531_rep03	93213296	7561948	0.0811252	0.0218767	0.0270886	0.00630598	23.2791
Peak Area Ratio of 2+ charge state of pY32 to labeled pY32*					Amount pY32* Spiked	Amount pY32	Amount Protein (ug)	pY32 (fmol)/IP Protein (ug)	Average	STD	%CV
	TIY[+80]VRDPTSNK (687.3267 m/z)	TIY[+80]VRDP(C13N15)TSNK (690.336 m/z)	Peak Area Ratio (pY32/pY32*)	Calibration Correction	fmol	fmol
light stim_LMW_0529_01	6720728	6447222	1.04242	0.712644	125	89.0805	19.8	4.49902
light stim_LMW_0529_rep02	7701477	6773717	1.13696	0.774574	125	96.8218	19.8	4.88999
light stim_LMW_0529_rep03	6894883	6113297	1.12785	0.768604	125	96.0754	19.8	4.8523	4.7471	0.215672	4.54324
light stim_LMW_0531_rep01	7678516	12923469	0.594153	0.419005	125	52.3756	79.72	0.656995
light stim_LMW_0531_rep02	7337825	12871387	0.570088	0.403241	125	50.4052	79.72	0.632277					These two high lighted sections are from the same 5/29 set. I integrated both charge states for peptide TIY[+80]VRDPTSNK (687.3267 m/z). If you notice both charges states have good corrlelation betweent the two. This is the set to choose as the illustrated experiment.
light stim_LMW_0531_rep03	7561948	13350427	0.56642	0.400838	125	50.1048	79.72	0.62851	0.639261	0.0154732	2.42048
Peak Area Ratio of 3+ Charge State of pY32 to unmodified Y32
3+ charge state	TIYVRDPTSNK (647.3435 m/z)	TIY[+80]VRDPTSNK (687.3267 m/z)	Peak Area Ratio (pY32/unmod Y32)	Calibration Correction (pY32/unmodified Y32	Average	STD	%CV
light stim_LMW_0529_rep01	177072864	3489603	0.0197072	0.0284207
light stim_LMW_0529_rep02	167305408	3989060	0.023843	0.0434765
light stim_LMW_0529_rep03	169016928	3807727	0.0225287	0.0386919	0.036863	0.00769271	20.8684
light stim_LMW_0531_rep01	230301808	3543511	0.0153864	0.0126916
light stim_LMW_0531_rep02	221441328	3439181	0.0155309	0.0132177
light stim_LMW_0531_rep03	247039600	3659532	0.0148135	0.0106063	0.0121718	0.0013811	11.3467
Peak Area Ratio of 3+ Charge State of pY32 to labeled pY32					Amount pY32* Spiked	Amount pY32	Amount Protein (ug)	pY32 (fmol)/IP Protein (ug)	Average	STD	%CV
	TIY[+80]VRDPTSNK (687.3267 m/z)	TIY[+80]VRDP(C13N15)TSNK (690.336 m/z)	Peak Area Ratio (pY32/pY32*)	Calibration Correction	fmol	fmol
light stim_LMW_0529_01	3489603	1428305	2.44318	0.738782	125	92.3478	19.8	4.66403
light stim_LMW_0529_rep02	3989060	1634164	2.44104	0.738146	125	92.2683	19.8	4.66001
light stim_LMW_0529_rep03	3807727	1542420	2.46867	0.746368	125	93.296	19.8	4.71192	4.67865	0.0288794	0.617259
light stim_LMW_0531_rep01	7678516	2945827	2.60657	0.787405	125	98.4256	79.72	1.23464
light stim_LMW_0531_rep02	7337825	3026603	2.42444	0.733207	125	91.6509	79.72	1.14966
light stim_LMW_0531_rep03	7561948	2865551	2.63892	0.797029	125	99.6286	79.72	1.24973	1.21134	0.0539505	4.45377
			pY32 (fmol)/IP Protein (ug)	Average	STD	%CV
		light stim_LMW_0529_rep01	4.66403
		light stim_LMW_0529_rep02	4.66001
		light stim_LMW_0529_rep03	4.71192	4.67865	0.0288794	0.617259
		light stim_LMW_0531_rep01	1.23464
		light stim_LMW_0531_rep02	1.14966
		light stim_LMW_0531_rep03	1.24973	1.21134	0.0539505	4.45377

## Sheet: Results
pY32 vs unmodified-Y32 LMW Stimulated
Average of 3 technical replicates	Average Ratio	STD	%CV
Unstimulated LMW 0529	0.05	0.009	18.143
Unstimulated LMW 031	0.027	0.006	23.279
pY32 vs pY32* LMW Stimulated
Average of 3 technical replicates	pY32 (fmol)/Lyn (mg)	STD	%CV
Stimulated LMW 0529	4.747	0.216	4.532
Stimulated LMW 031	0.639	0.0155	2.42
