# Supplementary material for: Unique-region phosphorylation targets LynA for rapid degradation, tuning its expression and signaling in myeloid cells
Source: eLife journal article supplement (doi:10.7554/elife.46043), 2019-07-08
Supplement: supp [file elife-46043-supp-v1.zip › elife_poa_e46043_Figure_4_figure_supplement_5_source_data_6.xlsx]

## Sheet: Skylines HMW Stim List
Peptide Modified Sequence	light stim_HMW_0529_01 Total Area	light stim_HMW_0529_rep02 Total Area	light stim_HMW_0529_rep03 Total Area	light stim_HMW_0531_rep01 Total Area	light stim_HMW_0531_rep02 Total Area	light stim_HMW_0531_rep03 Total Area	heavy stim_HMW_0529_01 Total Area	heavy stim_HMW_0529_rep02 Total Area	heavy stim_HMW_0529_rep03 Total Area	heavy stim_HMW_0531_rep01 Total Area	heavy stim_HMW_0531_rep02 Total Area	heavy stim_HMW_0531_rep03 Total Area
TIYVRDPTSNK	2789532	2614223	2855439	12720452	13129280	13926996	#N/A	#N/A	#N/A	#N/A	#N/A	#N/A
TIYVRDPTSNK	7338785	8688500	6974259	29221198	28632530	31658530	#N/A	#N/A	#N/A	#N/A	#N/A	#N/A
T[+80]IYVRDPTSNK	1375272	1430735	1483336	4123490	4177714	4381074	#N/A	#N/A	#N/A	#N/A	#N/A	#N/A
TIY[+80]VRDPTSNK	1468842	1570063	1688061	4508707	4493668	4750118	10771654	11456428	11959049	16918014	16866822	17785446
TIYVRDPT[+80]SNK	0	0	21379	11984	82093	76895	#N/A	#N/A	#N/A	#N/A	#N/A	#N/A
TIYVRDPT[+80]SNK	9660	1062527	1197554	175793	2191648	2446284	#N/A	#N/A	#N/A	#N/A	#N/A	#N/A
TIYVRDPTS[+80]NK	14386	93534	123559	334220	144153	295076	#N/A	#N/A	#N/A	#N/A	#N/A	#N/A
Stim High Molecular Weight

## Sheet: HMW stim
Peak Area Ratio of pY32 to unmodified Y32
2+ charge state	TIYVRDPTSNK	TIY[+80]VRDPTSNK	ratio pY32/unmod Y32	Calibration Correction	Average	STD	%CV
light stim_HMW_0529_01	2789532	1468842	0.526555	0.267794
light stim_HMW_0529_rep02	2614223	1570063	0.600585	0.308665
light stim_HMW_0529_rep03	2855439	1688061	0.591174	0.303469	0.293309	0.0222493	7.5856
light stim_HMW_0531_rep01	12720452	4508707	0.354446	0.172774
light stim_HMW_0531_rep02	13129280	4493668	0.342263	0.166048
light stim_HMW_0531_rep03	13926996	4750118	0.341073	0.165391	0.168071	0.00408609	2.43117
Peak Area Ratio of 2+ Charge State of pY32 to labeled pY32					Amount pY32* Spiked	Amount pY32	Amount Protein (ug)	pY32 (fmol)/IP (ug)	Average	STD	%CV
	TIY[+80]VRDPTSNK (687.3267 m/z)	TIY[+80]VRDP(C13N15)TSNK (690.336 m/z)	Peak Area Ratio (pY32/pY32*)	Calibration Correction	fmol	fmol
light stim_HMW_0529_01	1468842	10771654	0.136362	0.119129	125	14.8911	19.8	0.752075
light stim_HMW_0529_rep02	1570063	11456428	0.137046	0.119577	125	14.9471	19.8	0.754906
light stim_HMW_0529_rep03	1688061	11959049	0.141153	0.122267	125	15.2834	19.8	0.77189	0.759624	0.0107171	1.41084
light stim_HMW_0531_rep01	4508707	16918014	0.266503	0.204378	125	25.5472	79.2	0.322566
light stim_HMW_0531_rep02	4493668	16866822	0.266421	0.204324	125	25.5405	79.2	0.322481
light stim_HMW_0531_rep03	4750118	17785446	0.267079	0.204755	125	25.5944	79.2	0.323161	0.322736	0.000370761	0.114881
Peak Area Ratio of pY32 to unmodified Y32
3+ charge state	TIYVRDPTSNK	TIY[+80]VRDPTSNK	ratio pY32/unmod Y32	Calibration Correction	Average	STD	%CV
light stim_HMW_0529_01	7338785	806196	0.109854	0.356586
light stim_HMW_0529_rep02	8688500	822257	0.0946374	0.301192
light stim_HMW_0529_rep03	6974259	624528	0.0895476	0.282663	0.31348	0.0384629	12.2697
light stim_HMW_0531_rep01	29221198	2137390	0.0731452	0.222953
light stim_HMW_0531_rep02	28632530	2036052	0.0711097	0.215543
light stim_HMW_0531_rep03	31658530	1913036	0.0604272	0.176655	0.205051	0.0248686	12.128
Peak Area Ratio of 3+ Charge State of pY32 to labeled pY32					Amount pY32* Spiked	Amount pY32	Amount Protein (ug)	pY32 (fmol)/IP (ug)	Average	STD	%CV
	TIY[+80]VRDPTSNK (687.3267 m/z)	TIY[+80]VRDP(C13N15)TSNK (690.336 m/z)	Peak Area Ratio (pY32/pY32*)	Calibration Correction	fmol	fmol
light stim_HMW_0529_01	806196	2700306	0.298557	0.225375	125	28.1719	19.8	1.42282
light stim_HMW_0529_rep02	822257	2455088	0.33492	0.249194	125	31.1493	19.8	1.57319
light stim_HMW_0529_rep03	624528	2146114	0.291004	0.220427	125	27.5534	19.8	1.39159	1.46253	0.0970992	6.63911
light stim_HMW_0531_rep01	2137390	3207399	0.666394	0.466326	125	58.2908	79.2	0.735995
light stim_HMW_0531_rep02	2036052	3080256	0.661001	0.462794	125	57.8492	79.2	0.730419
light stim_HMW_0531_rep03	1913036	3447702	0.554873	0.393274	125	49.1593	79.2	0.620698	0.695704	0.0650167	9.34545

## Sheet: Results
pY32 vs unmodified-Y32 HMW Stimulated
Average of 3 technical replicates	Average Ratio	STD	%CV
Stimulated HMW 0529	0.293309	0.0222493	7.5856
Stimulated HMW 0531	0.168071	0.00408609	2.43117
pY32 vs pY32* HMW Stimulated
Average of 3 technical replicates	Average	STD	%CV
	pY32 (fmol)/Lyn (mg)
Stimulated HMW 0529	0.759624	0.0107171	1.41084
Stimulated HMW 0531	0.322736	0.000370761	0.114881
