# Supplementary material for: Unique-region phosphorylation targets LynA for rapid degradation, tuning its expression and signaling in myeloid cells
Source: eLife journal article supplement (doi:10.7554/elife.46043), 2019-07-08
Supplement: supp [file elife-46043-supp-v1.zip › elife_poa_e46043_Figure_4_source_data_1.xlsx]

## Sheet: Sheet 1
pY32 in low molecular weight (nonUb) band in resting and 3-IB-PP1-treated BMDTMs							Table Analyzed	pY32 v ug IP		Table Analyzed	pY32 v ug IP
	pY32/IP protein (fmol/ug)
Expt 1	tech replicate 1	tech replicate 2	tech replicate 3				Column B	3 nU pY32/ug 1		Column D	3 nU pY32/ug 2
LMW resting (2+)	0.434957	0.422383	0.338076				vs.	vs.		vs.	vs.
LMW 3-IB-PP1-treated (2+)	4.49902	4.88999	4.8523				Column A	r nU pY32/ug 1		Column C	r nU pY32/ug 2
HMW resting (2+)	below threshold of detection
HMW 3-IB-PP1-treated (2+)	not analyzed b/c no comparator						Unpaired t test			Unpaired t test
							P value	<0.0001		P value	<0.0001
Expt 2	tech replicates avg	tech replicates stdev	tech replicate 3				P value summary	****		P value summary	****
LMW resting (2+)	0.0988631	0.0973483	0.106132				Significantly different (P < 0.05)?	Yes		Significantly different (P < 0.05)?	Yes
LMW 3-IB-PP1-treated (2+)	0.656995	0.632277	0.62851				One- or two-tailed P value?	Two-tailed		One- or two-tailed P value?	Two-tailed
HMW resting (2+)	below threshold of detection						t, df	t=33.93, df=4		t, df	t=57.68, df=4
HMW 3-IB-PP1-treated (2+)	not analyzed b/c no comparator
							How big is the difference?			How big is the difference?
pY32 in low molecular weight (nonUb) band and high molecular weight band (polyUb) in 3-IB-PP1-treated BMDMs							Mean of column A	0.3985		Mean of column C	0.1008
	pY32/Y32 (fmol/fmol)						Mean of column B	4.747		Mean of column D	0.6393
Expt 1	tech replicate 1	tech replicate 2	tech replicate 3				Difference between means (B - A) ± SEM	4.349 ± 0.1282		Difference between means (D - C) ± SEM	0.5385 ± 0.009336
LMW 3-IB-PP1-treated (2+)	0.0432041	0.0602742	0.0464419				95% confidence interval	3.993 to 4.705		95% confidence interval	0.5126 to 0.5644
HMW 3-IB-PP1-treated (2+)	0.267794	0.308665	0.303469				R squared (eta squared)	0.9965		R squared (eta squared)	0.9988
Expt 2	tech replicates avg	tech replicates stdev	tech replicate 3				F test to compare variances			F test to compare variances
LMW 3-IB-PP1-treated (2+)	0.0340982	0.0252909	0.0218767				F, DFn, Dfd	16.76, 2, 2		F, DFn, Dfd	10.86, 2, 2
HMW 3-IB-PP1-treated (2+)	0.172774	0.166048	0.165391				P value	0.1126		P value	0.1687
							P value summary	ns		P value summary	ns
							Significantly different (P < 0.05)?	No		Significantly different (P < 0.05)?	No
ratio pY32 in low molecular weight (nonUb) band in resting and 3-IB-PP1-treated BMDMs					avg	stdev
Expt 1	10.3436	11.5772	14.3527		12.0911	2.05336	Data analyzed			Data analyzed
Expt 2	6.6455	6.495	5.92194		6.35415	0.381791	Sample size, column A	3		Sample size, column C	3
							Sample size, column B	3		Sample size, column D	3
ratio pY32 in low molecular weight (nonUb) band and high molecular weight band (polyUb) in 3-IB-PP1-treated BMDMs					avg	stdev
Expt 1	6.19834	5.12101	6.53439		5.95125	0.738375
Expt 2	5.06695	6.56552	7.56015		6.39754	1.25506
							Table Analyzed	pY32 v Y32		Table Analyzed	pY32 v Y32
							Column B	3pU pY32/Y32 1		Column D	3pU pY32/Y32 2
							vs.	vs.		vs.	vs.
							Column A	3 nU pY32/Y32 1		Column C	3 nU pY32/Y32 2
							Unpaired t test			Unpaired t test
							P value	<0.0001		P value	<0.0001
							P value summary	****		P value summary	****
							Significantly different (P < 0.05)?	Yes		Significantly different (P < 0.05)?	Yes
							One- or two-tailed P value?	Two-tailed		One- or two-tailed P value?	Two-tailed
							t, df	t=17.54, df=4		t, df	t=32.50, df=4
							How big is the difference?			How big is the difference?
							Mean of column A	0.04997		Mean of column C	0.02709
							Mean of column B	0.2933		Mean of column D	0.1681
							Difference between means (B - A) ± SEM	0.2433 ± 0.01387		Difference between means (D - C) ± SEM	0.1410 ± 0.004338
							95% confidence interval	0.2048 to 0.2818		95% confidence interval	0.1289 to 0.1530
							R squared (eta squared)	0.9872		R squared (eta squared)	0.9962
							F test to compare variances			F test to compare variances
							F, DFn, Dfd	6.022, 2, 2		F, DFn, Dfd	2.382, 2, 2
							P value	0.2848		P value	0.5914
							P value summary	ns		P value summary	ns
							Significantly different (P < 0.05)?	No		Significantly different (P < 0.05)?	No
							Data analyzed			Data analyzed
							Sample size, column A	3		Sample size, column C	3
							Sample size, column B	3		Sample size, column D	3
