# Supplementary material for: Unique-region phosphorylation targets LynA for rapid degradation, tuning its expression and signaling in myeloid cells
Source: eLife journal article supplement (doi:10.7554/elife.46043), 2019-07-08
Supplement: supp [file elife-46043-supp-v1.zip › elife_poa_e46043_Figure_5_source_data_1.xlsx]

## Sheet: Sheet1
LynA protein levels during 3-IB-PP1 treatment, +/- other inhibitors (norm to each)
time (min)	3-IB-PP1					+Bay-61-3606					+PP2					+PF43196
0	1	1	1	1	1	1	1	1	1	1	1	1	1	1		1	1	1
1	0.532	0.39	0.347	0.43	0.5251	0.504	0.384	0.358	0.39	0.5482	1.086	1.027	1.081	1.43		0.42	0.32	0.575
2			0.292	0.35	0.3719			0.28	0.36	0.2905			1.1	1.38		0.39	0.28	0.383
3	0.333	0.248	0.283	0.31	0.3319	0.304	0.258	0.249	0.29	0.2913	1.115	0.838	1.081	0.97		0.34	0.18	0.337
5	0.376	0.296	0.267	0.33	0.2987	0.28	0.261	0.304	0.42	0.3166	1.03	1.021	1.054	1.19		0.49	0.23	0.247
Within each row, compare columns (simple effects within rows)
Number of families	5
Number of comparisons per family	6
Alpha	0.05
Tukey's multiple comparisons test	Predicted (LS) mean diff.	95.00% CI of diff.	Significant?	Summary	Adjusted P Value
Row 1
3-IB-PP1 vs. +Bay-61-3606	0	-0.1374 to 0.1374	No	ns	>0.9999
3-IB-PP1 vs. +PP2	0	-0.1457 to 0.1457	No	ns	>0.9999
3-IB-PP1 vs. +PF43196	0	-0.1586 to 0.1586	No	ns	>0.9999
+Bay-61-3606 vs. +PP2	0	-0.1457 to 0.1457	No	ns	>0.9999
+Bay-61-3606 vs. +PF43196	0	-0.1586 to 0.1586	No	ns	>0.9999
+PP2 vs. +PF43196	0	-0.1659 to 0.1659	No	ns	>0.9999
Row 2
3-IB-PP1 vs. +Bay-61-3606	0.00798	-0.1294 to 0.1454	No	ns	0.9987
3-IB-PP1 vs. +PP2	-0.7112	-0.8569 to -0.5655	Yes	****	<0.0001
3-IB-PP1 vs. +PF43196	0.006487	-0.1522 to 0.1651	No	ns	0.9995
+Bay-61-3606 vs. +PP2	-0.7192	-0.8649 to -0.5734	Yes	****	<0.0001
+Bay-61-3606 vs. +PF43196	-0.001493	-0.1601 to 0.1572	No	ns	>0.9999
+PP2 vs. +PF43196	0.7177	0.5517 to 0.8836	Yes	****	<0.0001
Row 3
3-IB-PP1 vs. +Bay-61-3606	0.0278	-0.1496 to 0.2052	No	ns	0.9758
3-IB-PP1 vs. +PP2	-0.902	-1.100 to -0.7037	Yes	****	<0.0001
3-IB-PP1 vs. +PF43196	-0.01303	-0.1904 to 0.1643	No	ns	0.9974
+Bay-61-3606 vs. +PP2	-0.9298	-1.128 to -0.7315	Yes	****	<0.0001
+Bay-61-3606 vs. +PF43196	-0.04083	-0.2182 to 0.1365	No	ns	0.9289
+PP2 vs. +PF43196	0.889	0.6907 to 1.087	Yes	****	<0.0001
Row 4
3-IB-PP1 vs. +Bay-61-3606	0.02272	-0.1147 to 0.1601	No	ns	0.9718
3-IB-PP1 vs. +PP2	-0.6998	-0.8455 to -0.5541	Yes	****	<0.0001
3-IB-PP1 vs. +PF43196	0.01551	-0.1431 to 0.1742	No	ns	0.9939
+Bay-61-3606 vs. +PP2	-0.7225	-0.8683 to -0.5768	Yes	****	<0.0001
+Bay-61-3606 vs. +PF43196	-0.007207	-0.1659 to 0.1514	No	ns	0.9994
+PP2 vs. +PF43196	0.7153	0.5494 to 0.8813	Yes	****	<0.0001
Row 5
3-IB-PP1 vs. +Bay-61-3606	-0.00278	-0.1402 to 0.1346	No	ns	>0.9999
3-IB-PP1 vs. +PP2	-0.7602	-0.9059 to -0.6145	Yes	****	<0.0001
3-IB-PP1 vs. +PF43196	-0.008793	-0.1674 to 0.1499	No	ns	0.9989
+Bay-61-3606 vs. +PP2	-0.7574	-0.9032 to -0.6117	Yes	****	<0.0001
+Bay-61-3606 vs. +PF43196	-0.006013	-0.1647 to 0.1526	No	ns	0.9996
+PP2 vs. +PF43196	0.7514	0.5855 to 0.9173	Yes	****	<0.0001
Test details	Predicted (LS) mean 1	Predicted (LS) mean 2	Predicted (LS) mean diff.	SE of diff.	N1	N2	q	DF
Row 1
3-IB-PP1 vs. +Bay-61-3606	1	1	0	0.05197	5	5	0	59
3-IB-PP1 vs. +PP2	1	1	0	0.05512	5	4	0	59
3-IB-PP1 vs. +PF43196	1	1	0	0.06001	5	3	0	59
+Bay-61-3606 vs. +PP2	1	1	0	0.05512	5	4	0	59
+Bay-61-3606 vs. +PF43196	1	1	0	0.06001	5	3	0	59
+PP2 vs. +PF43196	1	1	0	0.06276	4	3	0	59
Row 2
3-IB-PP1 vs. +Bay-61-3606	0.4448	0.4368	0.00798	0.05197	5	5	0.2172	59
3-IB-PP1 vs. +PP2	0.4448	1.156	-0.7112	0.05512	5	4	18.25	59
3-IB-PP1 vs. +PF43196	0.4448	0.4383	0.006487	0.06001	5	3	0.1529	59
+Bay-61-3606 vs. +PP2	0.4368	1.156	-0.7192	0.05512	5	4	18.45	59
+Bay-61-3606 vs. +PF43196	0.4368	0.4383	-0.001493	0.06001	5	3	0.03519	59
+PP2 vs. +PF43196	1.156	0.4383	0.7177	0.06276	4	3	16.17	59
Row 3
3-IB-PP1 vs. +Bay-61-3606	0.338	0.3102	0.0278	0.06709	3	3	0.586	59
3-IB-PP1 vs. +PP2	0.338	1.24	-0.902	0.07501	3	2	17.01	59
3-IB-PP1 vs. +PF43196	0.338	0.351	-0.01303	0.06709	3	3	0.2747	59
+Bay-61-3606 vs. +PP2	0.3102	1.24	-0.9298	0.07501	3	2	17.53	59
+Bay-61-3606 vs. +PF43196	0.3102	0.351	-0.04083	0.06709	3	3	0.8607	59
+PP2 vs. +PF43196	1.24	0.351	0.889	0.07501	2	3	16.76	59
Row 4
3-IB-PP1 vs. +Bay-61-3606	0.3012	0.2785	0.02272	0.05197	5	5	0.6183	59
3-IB-PP1 vs. +PP2	0.3012	1.001	-0.6998	0.05512	5	4	17.96	59
3-IB-PP1 vs. +PF43196	0.3012	0.2857	0.01551	0.06001	5	3	0.3656	59
+Bay-61-3606 vs. +PP2	0.2785	1.001	-0.7225	0.05512	5	4	18.54	59
+Bay-61-3606 vs. +PF43196	0.2785	0.2857	-0.007207	0.06001	5	3	0.1698	59
+PP2 vs. +PF43196	1.001	0.2857	0.7153	0.06276	4	3	16.12	59
Row 5
3-IB-PP1 vs. +Bay-61-3606	0.3135	0.3163	-0.00278	0.05197	5	5	0.07565	59
3-IB-PP1 vs. +PP2	0.3135	1.074	-0.7602	0.05512	5	4	19.5	59
3-IB-PP1 vs. +PF43196	0.3135	0.3223	-0.008793	0.06001	5	3	0.2072	59
+Bay-61-3606 vs. +PP2	0.3163	1.074	-0.7574	0.05512	5	4	19.43	59
+Bay-61-3606 vs. +PF43196	0.3163	0.3223	-0.006013	0.06001	5	3	0.1417	59
+PP2 vs. +PF43196	1.074	0.3223	0.7514	0.06276	4	3	16.93	59
