# Supplementary material for: Unique-region phosphorylation targets LynA for rapid degradation, tuning its expression and signaling in myeloid cells
Source: eLife journal article supplement (doi:10.7554/elife.46043), 2019-07-08
Supplement: supp [file elife-46043-supp-v1.zip › elife_poa_e46043_Figure_6_figure_supplement_1_source_data_1.xlsx]

## Sheet: Sheet1
LynA protein levels during 3-IB-PP1 treatment, mutation analysis act (norm to each t=0)
Time (min)	LynA(WT)			LynA(K275R)								Compare each cell mean with the other cell mean in that row
	20190502 (Ben)	23 AJ190513	24 AJ190515	20190502 (Ben)	23 AJ190513	24 AJ190515
0	1	1	1	1	1	1						Number of families	1
5	0.533	0.660977	0.646707	0.818	0.988877	0.880292						Number of comparisons per family	3
20	0.639	0.785731	0.69956	0.737	0.854185	0.937991						Alpha	0.05
												Sidak's multiple comparisons test	Mean Diff.	95.00% CI of diff.	Significant?	Summary	Adjusted P Value
												LynA(WT) + c-Cbl - LynA(K275R) + c-Cbl
												Row 1	0	-0.1546 to 0.1546	No	ns	>0.9999
												Row 2	-0.2822	-0.4368 to -0.1276	Yes	***	0.0008
												Row 3	-0.135	-0.2896 to 0.01963	No	ns	0.0941
										1		Test details	Mean 1	Mean 2	Mean Diff.	SE of diff.	N1	N2	t	DF
												LynA(WT) + c-Cbl - LynA(K275R) + c-Cbl
												Row 1	1	1	0	0.0558	3	3	0	12
												Row 2	0.6136	0.8957	-0.2822	0.0558	3	3	5.056	12
												Row 3	0.7081	0.8431	-0.135	0.0558	3	3	2.419	12
