# Supplementary material for: Unique-region phosphorylation targets LynA for rapid degradation, tuning its expression and signaling in myeloid cells
Source: eLife journal article supplement (doi:10.7554/elife.46043), 2019-07-08
Supplement: supp [file elife-46043-supp-v1.zip › elife_poa_e46043_Figure_6_source_data_1.xlsx]

## Sheet: Sheet1
LynA protein levels during 3-IB-PP1 treatment, mutation analysis act (norm to each)
	LynA Jurkat					LynA T410K Jurkat					LynA Y397F Jurkat					LynA JCaM1.6					LynA T410K JCaM1.6					LynA Y397F JCaM1.6
	20180114	20180115	20180116	20180117	20180119	20180114	20180115	20180116	20180117	20180119	20180114	20180115	20180116	20180117	20180119	20180114	20180115	20180116	20180117	20180119	20180114	20180115	20180116	20180117	20180119	20180114	20180115	20180116	20180117	20180119
0	1	1	1			1	1	1			1	1	1					1	1	1			1	1	1			1	1	1
5	0.853	0.554	0.531			1.43	0.901	1.107			0.996	1.163	1.097					1.249	0.771	0.863			1.409	1.296	1.534			1.607	2.056	1.486
20	0.564	0.468	0.449			1.384	0.789	0.929			0.912	1.107	0.91					1.094	1.049	0.821			1.622	1.953	1.386			1.225	2.749	1.255
Within each row, compare columns (simple effects within rows)
Number of families	3
Number of comparisons per family	3
Alpha	0.05
Tukey's multiple comparisons test	Predicted (LS) mean diff.	95.00% CI of diff.	Significant?	Summary	Adjusted P Value
Row 1
LynA Jurkat vs. LynA T410K Jurkat	0	-0.3286 to 0.3286	No	ns	>0.9999
LynA Jurkat vs. LynA Y397F Jurkat	0	-0.3286 to 0.3286	No	ns	>0.9999
LynA T410K Jurkat vs. LynA Y397F Jurkat	0	-0.3286 to 0.3286	No	ns	>0.9999
Row 2
LynA Jurkat vs. LynA T410K Jurkat	-0.5	-0.8286 to -0.1714	Yes	**	0.003
LynA Jurkat vs. LynA Y397F Jurkat	-0.4393	-0.7680 to -0.1107	Yes	**	0.0083
LynA T410K Jurkat vs. LynA Y397F Jurkat	0.06067	-0.2680 to 0.3893	No	ns	0.8856
Row 3
LynA Jurkat vs. LynA T410K Jurkat	-0.5403	-0.8690 to -0.2117	Yes	**	0.0015
LynA Jurkat vs. LynA Y397F Jurkat	-0.4827	-0.8113 to -0.1540	Yes	**	0.004
LynA T410K Jurkat vs. LynA Y397F Jurkat	0.05767	-0.2710 to 0.3863	No	ns	0.896
Test details	Predicted (LS) mean 1	Predicted (LS) mean 2	Predicted (LS) mean diff.	SE of diff.	N1	N2	q	DF
Row 1
LynA Jurkat vs. LynA T410K Jurkat	1	1	0	0.1288	3	3	0	18
LynA Jurkat vs. LynA Y397F Jurkat	1	1	0	0.1288	3	3	0	18
LynA T410K Jurkat vs. LynA Y397F Jurkat	1	1	0	0.1288	3	3	0	18
Row 2
LynA Jurkat vs. LynA T410K Jurkat	0.646	1.146	-0.5	0.1288	3	3	5.492	18
LynA Jurkat vs. LynA Y397F Jurkat	0.646	1.085	-0.4393	0.1288	3	3	4.825	18
LynA T410K Jurkat vs. LynA Y397F Jurkat	1.146	1.085	0.06067	0.1288	3	3	0.6663	18
Row 3
LynA Jurkat vs. LynA T410K Jurkat	0.4937	1.034	-0.5403	0.1288	3	3	5.935	18
LynA Jurkat vs. LynA Y397F Jurkat	0.4937	0.9763	-0.4827	0.1288	3	3	5.301	18
LynA T410K Jurkat vs. LynA Y397F Jurkat	1.034	0.9763	0.05767	0.1288	3	3	0.6334	18
