# Supplementary material for: Unique-region phosphorylation targets LynA for rapid degradation, tuning its expression and signaling in myeloid cells
Source: eLife journal article supplement (doi:10.7554/elife.46043), 2019-07-08
Supplement: supp [file elife-46043-supp-v1.zip › elife_poa_e46043_Figure_7_source_data_1.xlsx]

## Sheet: Sheet1
LynAT410K (or LynA WT in the LynA-only postive control samples) protein levels during 3-IB-PP1 treatment
	LynAT410K					LynAT410K + LynAWT					LynAT410K+ LynAY32A					LynAT410K+ LynB					LynAWT					LynAT410K+ Hck p59					LynAT410K+ mFyn					LynAT410K+ hFynB					LynAT410K+ Fgr					LynAT410K+ Hck p56+59
0	1	1	1	1	1		1	1	1	1		1	1	1	1	1	1	1	1		1	1	1	1	1	1	1	1	1		1	1	1	1		1	1	1	1		1	1	1	1		1	1	1	1
5	1.02292	1.09881	1.21373	1.23251	1.30159		0.703639	0.880565	0.57429	0.859944		0.644336	0.578159	0.625603	0.676094	0.642321	0.841917	0.596067	0.416337		0.59359	0.518731	0.755611	0.499368	0.45392	0.922755	1.11859	1.11572	0.623486		1.06781	1.28174	1.17815	0.911137		0.892683	0.847666	1.37473	0.952311		0.806929	1.14891	0.754637	0.933914		0.851634	0.762544	0.784954	0.938179
20	1.04786	1.09331	1.03664	1.32831	1.54516		0.596478	0.911733	0.505111	0.92437		0.637411	0.578587	0.627101	0.749081	0.839412	0.734105	0.610489	0.445615		0.636114	0.511511	0.588766	0.533494	0.486068	0.936514	0.972345	0.932815	0.699577		0.965716	1.58479	1.09878	0.867872		0.693213	0.739839	1.11289	0.964141		0.846588	1.52676	0.851221	1.05981		0.857753	0.55067	0.677171	0.797974
avg 5 min	1.17391						0.754609					0.631048				0.624161					0.564244					0.945138					1.10971					1.01685					0.911098					0.834328
stdev	0.111532						0.143844					0.0409577				0.174859					0.118252					0.233199					0.158604					0.242409					0.175506					0.0788994
Within each row, compare columns (simple effects within rows)
Number of families	3
Number of comparisons per family	45
Alpha	0.05
Tukey's multiple comparisons test	Mean Diff.	95.00% CI of diff.	Significant?	Summary	Adjusted P Value
Row 1
Row 2
LynAT410K vs. LynAT410K + LynAWT	0.4193	0.006842 to 0.8318	Yes	*	0.0466
LynAT410K vs. LynAT410K+ LynAY32A	0.5429	0.2821 to 0.8037	Yes	**	0.0017
LynAT410K vs. LynAT410K+ LynB	0.5498	0.04652 to 1.053	Yes	*	0.0353
LynAT410K vs. LynAWT	0.6097	0.3052 to 0.9142	Yes	***	0.0007
LynAT410K vs. LynAT410K+ Hck p59	0.2288	-0.4639 to 0.9214	No	ns	0.7205
LynAT410K vs. LynAT410K+ mFyn	0.0642	-0.3902 to 0.5186	No	ns	0.9982
LynAT410K vs. LynAT410K+ hFynB	0.1571	-0.5667 to 0.8808	No	ns	0.9383
LynAT410K vs. LynAT410K+ Fgr	0.2628	-0.2424 to 0.7680	No	ns	0.389
LynAT410K vs. LynAT410K+ Hck p56+59	0.3396	0.06199 to 0.6172	Yes	*	0.018
LynAT410K + LynAWT vs. LynAT410K+ LynAY32A	0.1236	-0.3266 to 0.5737	No	ns	0.7826
LynAT410K + LynAWT vs. LynAT410K+ LynB	0.1304	-0.3966 to 0.6575	No	ns	0.9565
LynAT410K + LynAWT vs. LynAWT	0.1904	-0.2237 to 0.6044	No	ns	0.5645
LynAT410K + LynAWT vs. LynAT410K+ Hck p59	-0.1905	-0.8685 to 0.4874	No	ns	0.8889
LynAT410K + LynAWT vs. LynAT410K+ mFyn	-0.3551	-0.8484 to 0.1382	No	ns	0.1805
LynAT410K + LynAWT vs. LynAT410K+ hFynB	-0.2622	-0.9671 to 0.4426	No	ns	0.6944
LynAT410K + LynAWT vs. LynAT410K+ Fgr	-0.1565	-0.6849 to 0.3720	No	ns	0.8965
LynAT410K + LynAWT vs. LynAT410K+ Hck p56+59	-0.07972	-0.4991 to 0.3397	No	ns	0.9809
LynAT410K+ LynAY32A vs. LynAT410K+ LynB	0.006887	-0.5503 to 0.5641	No	ns	>0.9999
LynAT410K+ LynAY32A vs. LynAWT	0.0668	-0.2104 to 0.3440	No	ns	0.9487
LynAT410K+ LynAY32A vs. LynAT410K+ Hck p59	-0.3141	-1.072 to 0.4436	No	ns	0.4221
LynAT410K+ LynAY32A vs. LynAT410K+ mFyn	-0.4787	-0.9798 to 0.02245	No	ns	0.0573
LynAT410K+ LynAY32A vs. LynAT410K+ hFynB	-0.3858	-1.175 to 0.4034	No	ns	0.3056
LynAT410K+ LynAY32A vs. LynAT410K+ Fgr	-0.28	-0.8395 to 0.2794	No	ns	0.3045
LynAT410K+ LynAY32A vs. LynAT410K+ Hck p56+59	-0.2033	-0.4342 to 0.02760	No	ns	0.0789
LynAT410K+ LynB vs. LynAWT	0.05992	-0.4416 to 0.5615	No	ns	0.9994
LynAT410K+ LynB vs. LynAT410K+ Hck p59	-0.321	-1.010 to 0.3680	No	ns	0.5351
LynAT410K+ LynB vs. LynAT410K+ mFyn	-0.4855	-1.029 to 0.05830	No	ns	0.0807
LynAT410K+ LynB vs. LynAT410K+ hFynB	-0.3927	-1.105 to 0.3193	No	ns	0.369
LynAT410K+ LynB vs. LynAT410K+ Fgr	-0.2869	-0.8557 to 0.2818	No	ns	0.4808
LynAT410K+ LynB vs. LynAT410K+ Hck p56+59	-0.2102	-0.7287 to 0.3084	No	ns	0.5558
LynAWT vs. LynAT410K+ Hck p59	-0.3809	-1.068 to 0.3065	No	ns	0.2996
LynAWT vs. LynAT410K+ mFyn	-0.5455	-0.9997 to -0.09120	Yes	*	0.0226
LynAWT vs. LynAT410K+ hFynB	-0.4526	-1.171 to 0.2655	No	ns	0.2116
LynAWT vs. LynAT410K+ Fgr	-0.3469	-0.8504 to 0.1566	No	ns	0.1889
LynAWT vs. LynAT410K+ Hck p56+59	-0.2701	-0.5593 to 0.01909	No	ns	0.0686
LynAT410K+ Hck p59 vs. LynAT410K+ mFyn	-0.1646	-0.8453 to 0.5162	No	ns	0.9517
LynAT410K+ Hck p59 vs. LynAT410K+ hFynB	-0.07171	-0.8443 to 0.7009	No	ns	>0.9999
LynAT410K+ Hck p59 vs. LynAT410K+ Fgr	0.03404	-0.6553 to 0.7234	No	ns	>0.9999
LynAT410K+ Hck p59 vs. LynAT410K+ Hck p56+59	0.1108	-0.6050 to 0.8266	No	ns	0.9855
LynAT410K+ mFyn vs. LynAT410K+ hFynB	0.09286	-0.6130 to 0.7988	No	ns	0.9989
LynAT410K+ mFyn vs. LynAT410K+ Fgr	0.1986	-0.3465 to 0.7437	No	ns	0.7781
LynAT410K+ mFyn vs. LynAT410K+ Hck p56+59	0.2754	-0.1904 to 0.7411	No	ns	0.263
LynAT410K+ hFynB vs. LynAT410K+ Fgr	0.1058	-0.6066 to 0.8181	No	ns	0.9979
LynAT410K+ hFynB vs. LynAT410K+ Hck p56+59	0.1825	-0.5649 to 0.9300	No	ns	0.8662
LynAT410K+ Fgr vs. LynAT410K+ Hck p56+59	0.07677	-0.4439 to 0.5975	No	ns	0.9937
Row 3
LynAT410K vs. LynAT410K + LynAWT	0.4758	-0.1719 to 1.124	No	ns	0.1791
LynAT410K vs. LynAT410K+ LynAY32A	0.5622	0.04135 to 1.083	Yes	*	0.0368
LynAT410K vs. LynAT410K+ LynB	0.5529	-0.01469 to 1.120	No	ns	0.0566
LynAT410K vs. LynAWT	0.6591	0.1307 to 1.187	Yes	*	0.0212
LynAT410K vs. LynAT410K+ Hck p59	0.3249	-0.1990 to 0.8489	No	ns	0.3034
LynAT410K vs. LynAT410K+ mFyn	0.08097	-0.8304 to 0.9924	No	ns	>0.9999
LynAT410K vs. LynAT410K+ hFynB	0.3327	-0.2784 to 0.9438	No	ns	0.4421
LynAT410K vs. LynAT410K+ Fgr	0.1392	-0.7769 to 1.055	No	ns	0.9969
LynAT410K vs. LynAT410K+ Hck p56+59	0.4894	-0.04194 to 1.021	No	ns	0.0726
LynAT410K + LynAWT vs. LynAT410K+ LynAY32A	0.08638	-0.5755 to 0.7482	No	ns	0.9948
LynAT410K + LynAWT vs. LynAT410K+ LynB	0.07702	-0.5651 to 0.7191	No	ns	0.9996
LynAT410K + LynAWT vs. LynAWT	0.1832	-0.4982 to 0.8647	No	ns	0.7832
LynAT410K + LynAWT vs. LynAT410K+ Hck p59	-0.1509	-0.7773 to 0.4755	No	ns	0.9395
LynAT410K + LynAWT vs. LynAT410K+ mFyn	-0.3949	-1.323 to 0.5333	No	ns	0.6034
LynAT410K + LynAWT vs. LynAT410K+ hFynB	-0.1431	-0.8144 to 0.5282	No	ns	0.9826
LynAT410K + LynAWT vs. LynAT410K+ Fgr	-0.3367	-1.269 to 0.5958	No	ns	0.7461
LynAT410K + LynAWT vs. LynAT410K+ Hck p56+59	0.01353	-0.6128 to 0.6398	No	ns	>0.9999
LynAT410K+ LynAY32A vs. LynAT410K+ LynB	-0.00936	-0.5150 to 0.4963	No	ns	>0.9999
LynAT410K+ LynAY32A vs. LynAWT	0.09685	-0.1111 to 0.3048	No	ns	0.5573
LynAT410K+ LynAY32A vs. LynAT410K+ Hck p59	-0.2373	-0.6013 to 0.1267	No	ns	0.2146
LynAT410K+ LynAY32A vs. LynAT410K+ mFyn	-0.4812	-1.498 to 0.5351	No	ns	0.34
LynAT410K+ LynAY32A vs. LynAT410K+ hFynB	-0.2295	-0.8267 to 0.3678	No	ns	0.5608
LynAT410K+ LynAY32A vs. LynAT410K+ Fgr	-0.423	-1.445 to 0.5987	No	ns	0.4385
LynAT410K+ LynAY32A vs. LynAT410K+ Hck p56+59	-0.07285	-0.4705 to 0.3248	No	ns	0.9834
LynAT410K+ LynB vs. LynAWT	0.1062	-0.4161 to 0.6285	No	ns	0.9366
LynAT410K+ LynB vs. LynAT410K+ Hck p59	-0.2279	-0.7271 to 0.2713	No	ns	0.5523
LynAT410K+ LynB vs. LynAT410K+ mFyn	-0.4719	-1.401 to 0.4572	No	ns	0.3906
LynAT410K+ LynB vs. LynAT410K+ hFynB	-0.2201	-0.8205 to 0.3802	No	ns	0.7699
LynAT410K+ LynB vs. LynAT410K+ Fgr	-0.4137	-1.348 to 0.5203	No	ns	0.5115
LynAT410K+ LynB vs. LynAT410K+ Hck p56+59	-0.06349	-0.5709 to 0.4440	No	ns	0.9995
LynAWT vs. LynAT410K+ Hck p59	-0.3341	-0.7050 to 0.03673	No	ns	0.0713
LynAWT vs. LynAT410K+ mFyn	-0.5781	-1.613 to 0.4567	No	ns	0.2286
LynAWT vs. LynAT410K+ hFynB	-0.3263	-0.9425 to 0.2898	No	ns	0.2793
LynAWT vs. LynAT410K+ Fgr	-0.5199	-1.560 to 0.5202	No	ns	0.2919
LynAWT vs. LynAT410K+ Hck p56+59	-0.1697	-0.5777 to 0.2383	No	ns	0.5107
LynAT410K+ Hck p59 vs. LynAT410K+ mFyn	-0.244	-1.203 to 0.7146	No	ns	0.8696
LynAT410K+ Hck p59 vs. LynAT410K+ hFynB	0.007793	-0.5638 to 0.5794	No	ns	>0.9999
LynAT410K+ Hck p59 vs. LynAT410K+ Fgr	-0.1858	-1.150 to 0.7781	No	ns	0.9618
LynAT410K+ Hck p59 vs. LynAT410K+ Hck p56+59	0.1644	-0.2610 to 0.5899	No	ns	0.7321
LynAT410K+ mFyn vs. LynAT410K+ hFynB	0.2518	-0.6729 to 1.176	No	ns	0.9031
LynAT410K+ mFyn vs. LynAT410K+ Fgr	0.0582	-0.9770 to 1.093	No	ns	>0.9999
LynAT410K+ mFyn vs. LynAT410K+ Hck p56+59	0.4084	-0.5406 to 1.357	No	ns	0.492
LynAT410K+ hFynB vs. LynAT410K+ Fgr	-0.1936	-1.123 to 0.7356	No	ns	0.9742
LynAT410K+ hFynB vs. LynAT410K+ Hck p56+59	0.1566	-0.4179 to 0.7311	No	ns	0.9158
LynAT410K+ Fgr vs. LynAT410K+ Hck p56+59	0.3502	-0.6040 to 1.304	No	ns	0.6297
Test details	Mean 1	Mean 2	Mean Diff.	SE of diff.	N1	N2	q	DF
Row 1
LynAT410K vs. LynAT410K + LynAWT	1	1	0	0	5	4
LynAT410K vs. LynAT410K+ LynAY32A	1	1	0	0	5	4
LynAT410K vs. LynAT410K+ LynB	1	1	0	0	5	4
LynAT410K vs. LynAWT	1	1	0	0	5	5
LynAT410K vs. LynAT410K+ Hck p59	1	1	0	0	5	4
LynAT410K vs. LynAT410K+ mFyn	1	1	0	0	5	4
LynAT410K vs. LynAT410K+ hFynB	1	1	0	0	5	4
LynAT410K vs. LynAT410K+ Fgr	1	1	0	0	5	4
LynAT410K vs. LynAT410K+ Hck p56+59	1	1	0	0	5	4
LynAT410K + LynAWT vs. LynAT410K+ LynAY32A	1	1	0	0	4	4
LynAT410K + LynAWT vs. LynAT410K+ LynB	1	1	0	0	4	4
LynAT410K + LynAWT vs. LynAWT	1	1	0	0	4	5
LynAT410K + LynAWT vs. LynAT410K+ Hck p59	1	1	0	0	4	4
LynAT410K + LynAWT vs. LynAT410K+ mFyn	1	1	0	0	4	4
LynAT410K + LynAWT vs. LynAT410K+ hFynB	1	1	0	0	4	4
LynAT410K + LynAWT vs. LynAT410K+ Fgr	1	1	0	0	4	4
LynAT410K + LynAWT vs. LynAT410K+ Hck p56+59	1	1	0	0	4	4
LynAT410K+ LynAY32A vs. LynAT410K+ LynB	1	1	0	0	4	4
LynAT410K+ LynAY32A vs. LynAWT	1	1	0	0	4	5
LynAT410K+ LynAY32A vs. LynAT410K+ Hck p59	1	1	0	0	4	4
LynAT410K+ LynAY32A vs. LynAT410K+ mFyn	1	1	0	0	4	4
LynAT410K+ LynAY32A vs. LynAT410K+ hFynB	1	1	0	0	4	4
LynAT410K+ LynAY32A vs. LynAT410K+ Fgr	1	1	0	0	4	4
LynAT410K+ LynAY32A vs. LynAT410K+ Hck p56+59	1	1	0	0	4	4
LynAT410K+ LynB vs. LynAWT	1	1	0	0	4	5
LynAT410K+ LynB vs. LynAT410K+ Hck p59	1	1	0	0	4	4
LynAT410K+ LynB vs. LynAT410K+ mFyn	1	1	0	0	4	4
LynAT410K+ LynB vs. LynAT410K+ hFynB	1	1	0	0	4	4
LynAT410K+ LynB vs. LynAT410K+ Fgr	1	1	0	0	4	4
LynAT410K+ LynB vs. LynAT410K+ Hck p56+59	1	1	0	0	4	4
LynAWT vs. LynAT410K+ Hck p59	1	1	0	0	5	4
LynAWT vs. LynAT410K+ mFyn	1	1	0	0	5	4
LynAWT vs. LynAT410K+ hFynB	1	1	0	0	5	4
LynAWT vs. LynAT410K+ Fgr	1	1	0	0	5	4
LynAWT vs. LynAT410K+ Hck p56+59	1	1	0	0	5	4
LynAT410K+ Hck p59 vs. LynAT410K+ mFyn	1	1	0	0	4	4
LynAT410K+ Hck p59 vs. LynAT410K+ hFynB	1	1	0	0	4	4
LynAT410K+ Hck p59 vs. LynAT410K+ Fgr	1	1	0	0	4	4
LynAT410K+ Hck p59 vs. LynAT410K+ Hck p56+59	1	1	0	0	4	4
LynAT410K+ mFyn vs. LynAT410K+ hFynB	1	1	0	0	4	4
LynAT410K+ mFyn vs. LynAT410K+ Fgr	1	1	0	0	4	4
LynAT410K+ mFyn vs. LynAT410K+ Hck p56+59	1	1	0	0	4	4
LynAT410K+ hFynB vs. LynAT410K+ Fgr	1	1	0	0	4	4
LynAT410K+ hFynB vs. LynAT410K+ Hck p56+59	1	1	0	0	4	4
LynAT410K+ Fgr vs. LynAT410K+ Hck p56+59	1	1	0	0	4	4
Row 2
LynAT410K vs. LynAT410K + LynAWT	1.174	0.7546	0.4193	0.08753	5	4	6.775	5.607
LynAT410K vs. LynAT410K+ LynAY32A	1.174	0.631	0.5429	0.05392	5	4	14.24	5.263
LynAT410K vs. LynAT410K+ LynB	1.174	0.6242	0.5498	0.1007	5	4	7.724	4.883
LynAT410K vs. LynAWT	1.174	0.5642	0.6097	0.0727	5	5	11.86	7.973
LynAT410K vs. LynAT410K+ Hck p59	1.174	0.9451	0.2288	0.1268	5	4	2.551	4.096
LynAT410K vs. LynAT410K+ mFyn	1.174	1.11	0.0642	0.09368	5	4	0.9691	5.229
LynAT410K vs. LynAT410K+ hFynB	1.174	1.017	0.1571	0.1311	5	4	1.695	4.016
LynAT410K vs. LynAT410K+ Fgr	1.174	0.9111	0.2628	0.1009	5	4	3.682	4.87
LynAT410K vs. LynAT410K+ Hck p56+59	1.174	0.8343	0.3396	0.06359	5	4	7.552	6.946
LynAT410K + LynAWT vs. LynAT410K+ LynAY32A	0.7546	0.631	0.1236	0.07478	4	4	2.337	3.483
LynAT410K + LynAWT vs. LynAT410K+ LynB	0.7546	0.6242	0.1304	0.1132	4	4	1.63	5.785
LynAT410K + LynAWT vs. LynAWT	0.7546	0.5642	0.1904	0.08927	4	5	3.016	5.84
LynAT410K + LynAWT vs. LynAT410K+ Hck p59	0.7546	0.9451	-0.1905	0.137	4	4	1.967	4.994
LynAT410K + LynAWT vs. LynAT410K+ mFyn	0.7546	1.11	-0.3551	0.1071	4	4	4.691	5.944
LynAT410K + LynAWT vs. LynAT410K+ hFynB	0.7546	1.017	-0.2622	0.1409	4	4	2.631	4.88
LynAT410K + LynAWT vs. LynAT410K+ Fgr	0.7546	0.9111	-0.1565	0.1135	4	4	1.951	5.777
LynAT410K + LynAWT vs. LynAT410K+ Hck p56+59	0.7546	0.8343	-0.07972	0.08203	4	4	1.374	4.655
LynAT410K+ LynAY32A vs. LynAT410K+ LynB	0.631	0.6242	0.006887	0.0898	4	4	0.1085	3.328
LynAT410K+ LynAY32A vs. LynAWT	0.631	0.5642	0.0668	0.05671	4	5	1.666	5.136
LynAT410K+ LynAY32A vs. LynAT410K+ Hck p59	0.631	0.9451	-0.3141	0.1184	4	4	3.752	3.185
LynAT410K+ LynAY32A vs. LynAT410K+ mFyn	0.631	1.11	-0.4787	0.0819	4	4	8.265	3.398
LynAT410K+ LynAY32A vs. LynAT410K+ hFynB	0.631	1.017	-0.3858	0.1229	4	4	4.439	3.171
LynAT410K+ LynAY32A vs. LynAT410K+ Fgr	0.631	0.9111	-0.28	0.09011	4	4	4.395	3.326
LynAT410K+ LynAY32A vs. LynAT410K+ Hck p56+59	0.631	0.8343	-0.2033	0.04445	4	4	6.468	4.507
LynAT410K+ LynB vs. LynAWT	0.6242	0.5642	0.05992	0.1022	4	5	0.8293	5.086
LynAT410K+ LynB vs. LynAT410K+ Hck p59	0.6242	0.9451	-0.321	0.1457	4	4	3.115	5.563
LynAT410K+ LynB vs. LynAT410K+ mFyn	0.6242	1.11	-0.4855	0.118	4	4	5.817	5.944
LynAT410K+ LynB vs. LynAT410K+ hFynB	0.6242	1.017	-0.3927	0.1494	4	4	3.716	5.457
LynAT410K+ LynB vs. LynAT410K+ Fgr	0.6242	0.9111	-0.2869	0.1239	4	4	3.276	6
LynAT410K+ LynB vs. LynAT410K+ Hck p56+59	0.6242	0.8343	-0.2102	0.09592	4	4	3.099	4.173
LynAWT vs. LynAT410K+ Hck p59	0.5642	0.9451	-0.3809	0.128	5	4	4.207	4.227
LynAWT vs. LynAT410K+ mFyn	0.5642	1.11	-0.5455	0.09532	5	4	8.093	5.453
LynAWT vs. LynAT410K+ hFynB	0.5642	1.017	-0.4526	0.1322	5	4	4.84	4.138
LynAWT vs. LynAT410K+ Fgr	0.5642	0.9111	-0.3469	0.1025	5	4	4.788	5.073
LynAWT vs. LynAT410K+ Hck p56+59	0.5642	0.8343	-0.2701	0.06598	5	4	5.789	6.859
LynAT410K+ Hck p59 vs. LynAT410K+ mFyn	0.9451	1.11	-0.1646	0.141	4	4	1.651	5.286
LynAT410K+ Hck p59 vs. LynAT410K+ hFynB	0.9451	1.017	-0.07171	0.1682	4	4	0.603	5.991
LynAT410K+ Hck p59 vs. LynAT410K+ Fgr	0.9451	0.9111	0.03404	0.1459	4	4	0.3299	5.573
LynAT410K+ Hck p59 vs. LynAT410K+ Hck p56+59	0.9451	0.8343	0.1108	0.1231	4	4	1.273	3.678
LynAT410K+ mFyn vs. LynAT410K+ hFynB	1.11	1.017	0.09286	0.1448	4	4	0.9067	5.171
LynAT410K+ mFyn vs. LynAT410K+ Fgr	1.11	0.9111	0.1986	0.1183	4	4	2.375	5.94
LynAT410K+ mFyn vs. LynAT410K+ Hck p56+59	1.11	0.8343	0.2754	0.08857	4	4	4.397	4.399
LynAT410K+ hFynB vs. LynAT410K+ Fgr	1.017	0.9111	0.1058	0.1496	4	4	0.9994	5.467
LynAT410K+ hFynB vs. LynAT410K+ Hck p56+59	1.017	0.8343	0.1825	0.1275	4	4	2.025	3.629
LynAT410K+ Fgr vs. LynAT410K+ Hck p56+59	0.9111	0.8343	0.07677	0.09621	4	4	1.128	4.165
Row 3
LynAT410K vs. LynAT410K + LynAWT	1.21	0.7344	0.4758	0.1463	5	4	4.599	6.653
LynAT410K vs. LynAT410K+ LynAY32A	1.21	0.648	0.5622	0.1054	5	4	7.542	5.012
LynAT410K vs. LynAT410K+ LynB	1.21	0.6574	0.5529	0.1303	5	4	5.999	6.999
LynAT410K vs. LynAWT	1.21	0.5512	0.6591	0.1027	5	5	9.074	4.598
LynAT410K vs. LynAT410K+ Hck p59	1.21	0.8853	0.3249	0.1172	5	4	3.922	6.457
LynAT410K vs. LynAT410K+ mFyn	1.21	1.129	0.08097	0.1874	5	4	0.6111	5.193
LynAT410K vs. LynAT410K+ hFynB	1.21	0.8775	0.3327	0.1395	5	4	3.373	6.873
LynAT410K vs. LynAT410K+ Fgr	1.21	1.071	0.1392	0.188	5	4	1.047	5.175
LynAT410K vs. LynAT410K+ Hck p56+59	1.21	0.7209	0.4894	0.1202	5	4	5.758	6.682
LynAT410K + LynAWT vs. LynAT410K+ LynAY32A	0.7344	0.648	0.08638	0.1135	4	4	1.076	3.664
LynAT410K + LynAWT vs. LynAT410K+ LynB	0.7344	0.6574	0.07702	0.137	4	4	0.7951	5.684
LynAT410K + LynAWT vs. LynAWT	0.7344	0.5512	0.1832	0.111	4	5	2.333	3.384
LynAT410K + LynAWT vs. LynAT410K+ Hck p59	0.7344	0.8853	-0.1509	0.1245	4	4	1.714	4.818
LynAT410K + LynAWT vs. LynAT410K+ mFyn	0.7344	1.129	-0.3949	0.1921	4	4	2.908	5.273
LynAT410K + LynAWT vs. LynAT410K+ hFynB	0.7344	0.8775	-0.1431	0.1458	4	4	1.388	5.95
LynAT410K + LynAWT vs. LynAT410K+ Fgr	0.7344	1.071	-0.3367	0.1927	4	4	2.471	5.258
LynAT410K + LynAWT vs. LynAT410K+ Hck p56+59	0.7344	0.7209	0.01353	0.1274	4	4	0.1502	5.066
LynAT410K+ LynAY32A vs. LynAT410K+ LynB	0.648	0.6574	-0.00936	0.09204	4	4	0.1438	4.052
LynAT410K+ LynAY32A vs. LynAWT	0.648	0.5512	0.09685	0.04513	4	5	3.035	5.939
LynAT410K+ LynAY32A vs. LynAT410K+ Hck p59	0.648	0.8853	-0.2373	0.07219	4	4	4.648	4.794
LynAT410K+ LynAY32A vs. LynAT410K+ mFyn	0.648	1.129	-0.4812	0.1631	4	4	4.174	3.307
LynAT410K+ LynAY32A vs. LynAT410K+ hFynB	0.648	0.8775	-0.2295	0.1046	4	4	3.101	3.793
LynAT410K+ LynAY32A vs. LynAT410K+ Fgr	0.648	1.071	-0.423	0.1638	4	4	3.652	3.304
LynAT410K+ LynAY32A vs. LynAT410K+ Hck p56+59	0.648	0.7209	-0.07285	0.077	4	4	1.338	4.56
LynAT410K+ LynB vs. LynAWT	0.6574	0.5512	0.1062	0.08894	4	5	1.689	3.62
LynAT410K+ LynB vs. LynAT410K+ Hck p59	0.6574	0.8853	-0.2279	0.1053	4	4	3.061	5.522
LynAT410K+ LynB vs. LynAT410K+ mFyn	0.6574	1.129	-0.4719	0.1802	4	4	3.704	4.575
LynAT410K+ LynB vs. LynAT410K+ hFynB	0.6574	0.8775	-0.2201	0.1297	4	4	2.4	5.872
LynAT410K+ LynB vs. LynAT410K+ Fgr	0.6574	1.071	-0.4137	0.1809	4	4	3.235	4.562
LynAT410K+ LynB vs. LynAT410K+ Hck p56+59	0.6574	0.7209	-0.06349	0.1086	4	4	0.8264	5.734
LynAWT vs. LynAT410K+ Hck p59	0.5512	0.8853	-0.3341	0.06819	5	4	6.929	4.128
LynAWT vs. LynAT410K+ mFyn	0.5512	1.129	-0.5781	0.1613	5	4	5.067	3.176
LynAWT vs. LynAT410K+ hFynB	0.5512	0.8775	-0.3263	0.1019	5	4	4.528	3.461
LynAWT vs. LynAT410K+ Fgr	0.5512	1.071	-0.5199	0.1621	5	4	4.536	3.174
LynAWT vs. LynAT410K+ Hck p56+59	0.5512	0.7209	-0.1697	0.07326	5	4	3.276	3.957
LynAT410K+ Hck p59 vs. LynAT410K+ mFyn	0.8853	1.129	-0.244	0.1709	4	4	2.019	3.906
LynAT410K+ Hck p59 vs. LynAT410K+ hFynB	0.8853	0.8775	0.007793	0.1165	4	4	0.09463	5.089
LynAT410K+ Hck p59 vs. LynAT410K+ Fgr	0.8853	1.071	-0.1858	0.1716	4	4	1.531	3.898
LynAT410K+ Hck p59 vs. LynAT410K+ Hck p56+59	0.8853	0.7209	0.1644	0.09243	4	4	2.516	5.958
LynAT410K+ mFyn vs. LynAT410K+ hFynB	1.129	0.8775	0.2518	0.1869	4	4	1.905	4.999
LynAT410K+ mFyn vs. LynAT410K+ Fgr	1.129	1.071	0.0582	0.2255	4	4	0.365	6
LynAT410K+ mFyn vs. LynAT410K+ Hck p56+59	1.129	0.7209	0.4084	0.173	4	4	3.339	4.063
LynAT410K+ hFynB vs. LynAT410K+ Fgr	0.8775	1.071	-0.1936	0.1876	4	4	1.459	4.984
LynAT410K+ hFynB vs. LynAT410K+ Hck p56+59	0.8775	0.7209	0.1566	0.1195	4	4	1.853	5.34
LynAT410K+ Fgr vs. LynAT410K+ Hck p56+59	1.071	0.7209	0.3502	0.1737	4	4	2.851	4.053
