# Supplementary material for: Unique-region phosphorylation targets LynA for rapid degradation, tuning its expression and signaling in myeloid cells
Source: eLife journal article supplement (doi:10.7554/elife.46043), 2019-07-08
Supplement: supp [file elife-46043-supp-v1.zip › elife_poa_e46043_Figure_8_source_data_1.xlsx]

## Sheet: Sheet1
mRNA expression from ImmGen Databank
	Lyn	Cbl	Cblb
MF (Lung Alv)	2517.83	530.085	124.784
MF (Adipose)	2615.13	1453.75	120.601
MF (PC)	3438.9	578.442	174.102
MF (Brain MG)	5268.1	1525.15	129.065
MF (Spl RP)	6510.18	1408.95	308.82
Mast/Bas (PC hep)	1683.81	95.0404	1265.48
Neutr (BM)	4341.04	1561.94	8.74517
Neutr (Spl)	5503.07	1561.94	128.192
Neutr (PC Thio)	10656	1677.46	19.9531
DC (CD8+ Spl)	1966.78	1009.75	992.313
DC (pDC)	2415.84	999.168	455.423
DC (CD4+ Spl)	4069.24	1059.91	386.39
Mono (L6chi)	6550.38	2044.44	523.646
Mono (L6clo)	6911.92	1861.9	1352.56
