# Supplementary material for: Unique-region phosphorylation targets LynA for rapid degradation, tuning its expression and signaling in myeloid cells
Source: eLife journal article supplement (doi:10.7554/elife.46043), 2019-07-08
Supplement: supp [file elife-46043-supp-v1.zip › elife_poa_e46043_Figure_9_source_data_1.xlsx]

## Sheet: Sheet1
Cbl protein expression in macrophages vs. mast cells (rel. to primed macrophages)
	Macro unprimed			Mast cells
	Sheet1	Sheet1 (2)	Sheet1 (3)	Sheet1	Sheet1 (2)	Sheet1 (3)
c-Cbl	0.65	0.63	0.74	0.22	0.11	0.08
Cbl-b	0.69	0.62	0.37	0.51	0.4	0.4
LynA protein levels during 3-IB-PP1 treatment (norm to each)
Time (min)	Macro				Mast				Macro Primed										Within each row, compare columns (simple effects within rows)
	20170603_harvest	20170207_harvest	20170207_harvest (2)	201805_inhibitors	20170603_harvest	20170207_harvest	20170207_harvest (2)	201805_inhibitors	20170603_harvest	20170207_harvest	20170207_harvest (2)	201805_inhibitors															Within each row, compare columns (simple effects within rows)													Table Analyzed	Normal to totalpro, t=0 for each								Compare each cell mean with the other cell mean in that row
0	1	1	1	1	1	1	1			1	1	1							Number of families	4
1	0.19	0.81	0.4	0.55	0.82	0.99	1.03			0.65	0.47	0.35							Number of comparisons per family	3							Number of families	1												Mixed-effects model (REML)	Matching: Stacked								Number of families
3	0.14	0.31	0.36	0.36	0.68	1.18	1.31			0.3	0.36	0.33							Alpha	0.05							Number of comparisons per family	9												Assume sphericity?	No								Number of comparisons per family
5	0.27	0.34	0.42	0.87	0.52	1.71	1.58			0.43	0.49	0.36															Alpha	0.05												Alpha	0.05								Alpha
																			Tukey's multiple comparisons test	Predicted (LS) mean diff.	95.00% CI of diff.	Significant?	Summary	Adjusted P Value
LynA protein levels during 3-IB-PP1 treatment (macrophage unprimed t=0)																											Sidak's multiple comparisons test	Predicted (LS) mean diff.	95.00% CI of diff.	Significant?	Summary	Adjusted P Value								Fixed effects (type III)	P value	P value summary	Statistically significant (P < 0.05)?	F (DFn, DFd)	Geisser-Greenhouse's epsilon				Sidak's multiple comparisons test
Time (min)	Macro				Mast				Macro Primed										Row 1																					Row Factor	0.5539	ns	No	F (1.321, 4.403) = 0.5264	0.4403
	20170603_harvest	20170207_harvest	20170207_harvest (2)	201805_inhibitors	20170603_harvest	20170207_harvest	20170207_harvest (2)	201805_inhibitors	20170603_harvest	20170207_harvest	20170207_harvest (2)	201805_inhibitors							Macro vs. Mast	0	-0.4532 to 0.4532	No	ns	>0.9999			Row 1													Column Factor	0.0229	*	Yes	F (1, 4) = 12.90					no saRNA - c-Cbl saRNA
0	1	1	1	1	1.874	1.236	0.856			1.274	1.582	2.16							Macro vs. Macro Primed	0	-0.4532 to 0.4532	No	ns	>0.9999			unprimed mac vs. primed mac	0.08128	-17.07 to 17.23	No	ns	>0.9999								Row Factor x Column Factor	0.1513	ns	No	F (3, 10) = 2.198					Row 1
1	0.189	0.812	0.399	0.55	1.546	1.218	0.879			0.832	0.749	0.77							Mast vs. Macro Primed	0	-0.4845 to 0.4845	No	ns	>0.9999			unprimed mac vs. mast	-0.4301	-19.10 to 18.24	No	ns	>0.9999																	Row 2
3	0.136	0.306	0.363	0.36	1.282	1.463	1.121			0.379	0.572	0.71															primed mac vs. mast	-0.5113	-20.04 to 19.02	No	ns	>0.9999								Random effects	SD	Variance							Row 3
5	0.274	0.337	0.422	0.87	0.97	2.114	1.352			0.554	0.774	0.77							Row 2																					Subject	0.05545	0.003074
																			Macro vs. Mast	-0.4592	-0.9124 to -0.005969	Yes	*	0.0466			Row 2													Residual	0.2112	0.04459
pErk during 3-IB-PP1 treatment (rel macrophage unprimed t=0)																			Macro vs. Macro Primed	-0.0025	-0.4557 to 0.4507	No	ns	0.9999			unprimed mac vs. primed mac	-1.16	-18.31 to 15.99	No	ns	>0.9999																	Test details
time (min)	unprimed mac					primed mac					mast								Mast vs. Macro Primed	0.4567	-0.02782 to 0.9412	No	ns	0.0676			unprimed mac vs. mast	-19.73	-38.40 to -1.059	Yes	*	0.033								Was the matching effective?
	20170603_harvest	20170207_harvest	20170207_Harvest (2)	201805	201805_inhibitors	20170603_harvest	20170207_harvest	20170207_Harvest (2)	201805	201805_inhibitors	20170603_harvest	20170207_harvest	20170207_Harvest (2)	201805	201805_inhibitors												primed mac vs. mast	-18.57	-38.10 to 0.9562	No	ns	0.0708								Chi-square, df	0.06456, 1								no saRNA - c-Cbl saRNA
0	1	1	1	1	1		0.820891	0.589466	1.01826	1.24628	1	2.32345	0.966735						Row 3																					P value	0.7994								Row 1
1	0.621259	1.21676	1.00813	1.16588	0.849229		2.67138	1.30637	2.09374	2.45613	52.6456	7.25644	2.20612						Macro vs. Mast	-0.7642	-1.217 to -0.3110	Yes	***	0.0008			Row 3													P value summary	ns								Row 2
3	1.2958	2.19994	1.49768	3.54158	2.9309		4.5185	6.97959	23.0332	19.8394	18.3739	14.2295	1.66936						Macro vs. Macro Primed	-0.0375	-0.4907 to 0.4157	No	ns	0.9772			unprimed mac vs. primed mac	-11.3	-28.45 to 5.851	No	ns	0.4162								Is there significant matching (P < 0.05)?	No								Row 3
																			Mast vs. Macro Primed	0.7267	0.2422 to 1.211	Yes	**	0.0025			unprimed mac vs. mast	-9.131	-27.80 to 9.540	No	ns	0.7764
																											primed mac vs. mast	2.168	-17.36 to 21.70	No	ns	>0.9999								Difference between column means
Cbl protein upregulation in mast cells w/ saRNA (rel to no saRNA)																			Row 4																					Predicted mean of no saRNA	1.24
		0409_harvest_0602 lip2000	0418harvest_cbl_0608	blot 2	avg	stdev													Macro vs. Mast	-0.795	-1.248 to -0.3418	Yes	***	0.0005																Predicted mean of c-Cbl saRNA	0.8724
Cbl expt saRNA		1.47563	2.16044	2.95661	2.19756	0.741184													Macro vs. Macro Primed	0.04833	-0.4049 to 0.5015	No	ns	0.9624			Test details	Predicted (LS) mean 1	Predicted (LS) mean 2	Predicted (LS) mean diff.	SE of diff.	N1	N2	t	DF					Difference between predicted means	0.3673
																			Mast vs. Macro Primed	0.8433	0.3588 to 1.328	Yes	***	0.0005																SE of difference	0.1023
LynA protein levels during 3-IB-PP1 treatment (norm to each)																											Row 1													95% CI of difference	0.08333 to 0.6513
time (min)	no saRNA			c-Cbl saRNA																							unprimed mac vs. primed mac	1	0.9187	0.08128	5.708	5	4	0.01424	27
	0409_harvest_0602 lip2000	0418harvest_cbl_0608	Myra blot 2	0409_harvest_0602 lip2000	0418harvest_cbl_0608	Myra blot 2													Test details	Predicted (LS) mean 1	Predicted (LS) mean 2	Predicted (LS) mean diff.	SE of diff.	N1	N2	q	unprimed mac vs. mast	1	1.43	-0.4301	6.215	5	3	0.0692	27					Data summary
0	1	1	1	1	1	1																					primed mac vs. mast	0.9187	1.43	-0.5113	6.499	4	3	0.07868	27					Number of columns (Column Factor)	2
1	1.41846	1.42464	1.03034	1.15521	0.839926	0.839008													Row 1																					Number of rows (Row Factor)	4
5	1.64815	0.99278	1.39362	0.953151	0.638312	1.02153													Macro vs. Mast	1	1	0	0.1832	4	3	0	Row 2													Number of subjects (Subject)	6
15		1.0188	1.60219		0.55033	0.780461													Macro vs. Macro Primed	1	1	0	0.1832	4	3	0	unprimed mac vs. primed mac	0.9723	2.132	-1.16	5.708	5	4	0.2031	27					Number of missing values	2
avg	stdev	1.31049	0.412517		0.665396	0.162727													Mast vs. Macro Primed	1	1	0	0.1958	3	3	0	unprimed mac vs. mast	0.9723	20.7	-19.73	6.215	5	3	3.175	27
1-avg		-0.310493			0.334604																						primed mac vs. mast	2.132	20.7	-18.57	6.499	4	3	2.857	27
pErk during 3-IB-PP1 treatment (norm to each)																			Row 2
time (min)	no saRNA			c-Cbl saRNA															Macro vs. Mast	0.4875	0.9467	-0.4592	0.1832	4	3	3.545	Row 3
	0409_harvest_0602 lip2000	0418harvest_cbl_0608	Myra blot 2	0409_harvest_0602 lip2000	0418harvest_cbl_0608	Myra blot 2													Macro vs. Macro Primed	0.4875	0.49	-0.0025	0.1832	4	3	0.0193	unprimed mac vs. primed mac	2.293	13.59	-11.3	5.708	5	4	1.979	27
0	1	1	1	1	1	1													Mast vs. Macro Primed	0.9467	0.49	0.4567	0.1958	3	3	3.298	unprimed mac vs. mast	2.293	11.42	-9.131	6.215	5	3	1.469	27
1	3.73139	3.53	1.50893	1.2448	0.698	1.03129																					primed mac vs. mast	13.59	11.42	2.168	6.499	4	3	0.3336	27
3	1.04866	1.807	0.569383	0.829503	0.568	0.921885													Row 3
avg	stdev	2.92344	1.22913		0.991363	0.275578													Macro vs. Mast	0.2925	1.057	-0.7642	0.1832	4	3	5.9	28
																			Macro vs. Macro Primed	0.2925	0.33	-0.0375	0.1832	4	3	0.2895	28
																			Mast vs. Macro Primed	1.057	0.33	0.7267	0.1958	3	3	5.248	28
																			Row 4
																			Macro vs. Mast	0.475	1.27	-0.795	0.1832	4	3	6.138	28
																			Macro vs. Macro Primed	0.475	0.4267	0.04833	0.1832	4	3	0.3732	28
																			Mast vs. Macro Primed	1.27	0.4267	0.8433	0.1958	3	3	6.091	28
																			Within each row, compare columns (simple effects within rows)
																			Number of families	4
																			Number of comparisons per family	3
																			Alpha	0.05
																			Tukey's multiple comparisons test	Predicted (LS) mean diff.	95.00% CI of diff.	Significant?	Summary	Adjusted P Value
																			Row 1
																			Macro vs. Mast	-0.322	-0.8802 to 0.2362	No	ns	0.3409
																			Macro vs. Macro Primed	-0.672	-1.230 to -0.1138	Yes	*	0.0158
																			Mast vs. Macro Primed	-0.35	-0.9467 to 0.2467	No	ns	0.3292
																			Row 2
																			Macro vs. Mast	-0.7268	-1.285 to -0.1687	Yes	**	0.0088
																			Macro vs. Macro Primed	-0.2962	-0.8543 to 0.2620	No	ns	0.4
																			Mast vs. Macro Primed	0.4307	-0.1661 to 1.027	No	ns	0.1927
																			Row 3
																			Macro vs. Mast	-0.9974	-1.556 to -0.4392	Yes	***	0.0004
																			Macro vs. Macro Primed	-0.2624	-0.8206 to 0.2958	No	ns	0.4844
																			Mast vs. Macro Primed	0.735	0.1383 to 1.332	Yes	*	0.0134
																			Row 4
																			Macro vs. Mast	-1.003	-1.561 to -0.4447	Yes	***	0.0004
																			Macro vs. Macro Primed	-0.2236	-0.7818 to 0.3346	No	ns	0.5884
																			Mast vs. Macro Primed	0.7793	0.1826 to 1.376	Yes	**	0.0086
																			Test details	Predicted (LS) mean 1	Predicted (LS) mean 2	Predicted (LS) mean diff.	SE of diff.	N1	N2	q	DF
																			Row 1
																			Macro vs. Mast	1	1.322	-0.322	0.2256	4	3	2.019	28
																			Macro vs. Macro Primed	1	1.672	-0.672	0.2256	4	3	4.213	28
																			Mast vs. Macro Primed	1.322	1.672	-0.35	0.2412	3	3	2.052	28
																			Row 2
																			Macro vs. Mast	0.4875	1.214	-0.7268	0.2256	4	3	4.557	28
																			Macro vs. Macro Primed	0.4875	0.7837	-0.2962	0.2256	4	3	1.857	28
																			Mast vs. Macro Primed	1.214	0.7837	0.4307	0.2412	3	3	2.526	28
																			Row 3
																			Macro vs. Mast	0.2913	1.289	-0.9974	0.2256	4	3	6.253	28
																			Macro vs. Macro Primed	0.2913	0.5537	-0.2624	0.2256	4	3	1.645	28
																			Mast vs. Macro Primed	1.289	0.5537	0.735	0.2412	3	3	4.31	28
																			Row 4
																			Macro vs. Mast	0.4758	1.479	-1.003	0.2256	4	3	6.287	28
																			Macro vs. Macro Primed	0.4758	0.6993	-0.2236	0.2256	4	3	1.402	28
																			Mast vs. Macro Primed	1.479	0.6993	0.7793	0.2412	3	3	4.57	28
																			Number of families	1
																			Number of comparisons per family	3
																			Alpha	0.05
																			Tukey's multiple comparisons test	Mean Diff.	95.00% CI of diff.	Significant?	Summary	Adjusted P Value
																			Mast cells vs. Macrophages (unprimed)	35.38	10.33 to 60.42	Yes	**	0.0085	A-B
																			Mast cells vs. Macrophages (primed)	24.75	-1.442 to 50.95	No	ns	0.0635	A-C
																			Macrophages (unprimed) vs. Macrophages (primed)	-10.62	-33.63 to 12.38	No	ns	0.4355	B-C
																			Test details	Mean 1	Mean 2	Mean Diff.	SE of diff.	n1	n2	q	DF
																			Mast cells vs. Macrophages (unprimed)	38.39	3.011	35.38	8.971	3	5	5.577	9
																			Mast cells vs. Macrophages (primed)	38.39	13.63	24.75	9.382	3	4	3.731	9
																			Macrophages (unprimed) vs. Macrophages (primed)	3.011	13.63	-10.62	8.24	5	4	1.823	9
																			Compare each cell mean with the other cell mean in that row
																			Number of families	1
																			Number of comparisons per family	2
																			Alpha	0.05
																			Sidak's multiple comparisons test	Mean Diff.	95.00% CI of diff.	Significant?	Summary	Adjusted P Value
																			Macro unprimed - Mast cells
																			c-Cbl	0.5367	0.2846 to 0.7888	Yes	**	0.0035
																			Cbl-b	0.1233	-0.1288 to 0.3754	No	ns	0.3007
																			Test details	Mean 1	Mean 2	Mean Diff.	SE of diff.	N1	N2	t	DF
																			Macro unprimed - Mast cells
																			c-Cbl	0.6733	0.1367	0.5367	0.07242	3	3	7.411	4
																			Cbl-b	0.56	0.4367	0.1233	0.07242	3	3	1.703	4
[truncated: 8 more columns]
